1

2           **Insects and associated arthropods analyzed during medicolegal**  
3 **death investigations in Harris County, Texas, USA: January 2013-**  
4 **April 2016**

5

6 Michelle R. Sanford<sup>1\*</sup>

7

8 <sup>1</sup>Harris County Institute of Forensic Sciences, Houston, TX, United States of America

9

10

11 \*Corresponding author

12 Email: michelle.sanford@ifs.hctx.net

13

14

15 **ABSTRACT** -The application of insect and arthropod information to medicolegal death  
16 investigations is one of the more exacting applications of entomology. Historically limited to  
17 homicide investigations, the integration of full time forensic entomology services to the medical  
18 examiner's office in Harris County has opened up the opportunity to apply entomology to a wide  
19 variety of manner of death classifications and types of scenes to make observations on a number  
20 of different geographical and species-level trends in Harris County, Texas, USA. In this study, a  
21 retrospective analysis was made of 203 forensic entomology cases analyzed during the course of  
22 medicolegal death investigations performed by the Harris County Institute of Forensic Sciences  
23 in Houston, TX, USA from January 2013 through April 2016. These cases included all manner  
24 of death classifications, stages of decomposition and a variety of different scene types that were  
25 classified into decedents transported from the hospital (typically associated with myiasis or sting  
26 allergy; 3.0%), outdoor scenes (32.0%) or indoor scenes (65.0%). Ambient scene air temperature  
27 at the time scene investigation was the only significantly different factor observed between  
28 indoor and outdoor scenes with average indoor scene temperature being slightly cooler (25.2°C)  
29 than that observed outdoors (28.0°C). Relative humidity was not found to be significantly  
30 different between scene types. Most of the indoor scenes were classified as natural (43.3%)  
31 whereas most of the outdoor scenes were classified as homicides (12.3%). All other manner of  
32 death classifications came from both indoor and outdoor scenes. Several species were found to  
33 be significantly associated with indoor scenes as indicated by a binomial test, including  
34 *Blaesoxipha plinthopyga* (Sarcophagidae), all Sarcophagidae including *B. plinthopyga*,  
35 *Megaselia scalaris* (Phoridae), *Synthesiomyia nudiseta* (Muscidae) and *Lucilia cuprina*  
36 (Calliphoridae). The only species that was a significant indicator of an outdoor scene was *Lucilia*  
37 *eximia* (Calliphoridae). All other insect species that were collected in five or more cases were

38 collected from both indoor and outdoor scenes. A species list with month of collection and basic  
39 scene characteristics with the length of the estimated time of colonization is also presented. The  
40 data presented here provide valuable casework related species data for Harris County, TX and  
41 nearby areas on the Gulf Coast that can be used to compare to other climate regions with other  
42 species assemblages and to assist in identifying new species introductions to the area. This study  
43 also highlights the importance of potential sources of uncertainty in preparation and  
44 interpretation of forensic entomology reports from different scene types.

45 **KEYWORDS:** Post-mortem interval, Calliphoridae, Sarcophagidae, Decomposition,  
46 Medicolegal Death Investigation

47

## 48 INTRODUCTION

49 While forensic entomology has a broad scope, one of its most challenging applications is  
50 to medicolegal death investigations. The application of the information provided by insects and  
51 associated arthropods to death investigations can take many forms ranging from direct  
52 association with cause of death (e.g. insect sting allergy), to information related to decedent  
53 travel history (e.g. ticks traveling with their host decedents), to the estimation of time of insect  
54 colonization (TOC) that can be used to approximate the post-mortem interval (PMI; [1]). The use  
55 of insect colonization and development in estimating the PMI is one of the most well-known  
56 applications of forensic entomology in the medicolegal setting [2].

57 Since its first recorded application to the death investigation of the infamous bloody  
58 sickle [3] to the more recent application to the time of death of Danielle van Dam [4] forensic  
59 entomology has had a strong association with homicide investigation and crime scene analysis  
60 [1,2,5]. The recent addition of forensic entomology services to the medical examiner's office has  
61 led to an even broader application of forensic entomology to medicolegal death investigations  
62 across all manners of death [6]. When one starts to investigate the insects associated with a broad  
63 range of decedents, scenes and manners of death one starts to appreciate the breadth of forensic  
64 entomology casework opportunities. One of the first steps to understanding these cases is in the  
65 identification of the insects involved in colonizing human remains in a given geographic  
66 location, their seasonality and the characteristics of the scenes where they are found.

67 Forensic entomology surveys of different geographic locations are often performed as a  
68 first step in establishing baseline data (e.g. [7–9]). However, these types of studies are often  
69 based on trapping adult flies or using animal models and are not typically based on casework  
70 information. In Texas, survey information specific to forensically important insects is rare with  
71 only a few published surveys available from Central Texas [9,10]. Blow fly (Diptera:

72 Calliphoridae) trapping studies were prevalent prior to and immediately following the  
73 screwworm eradication program but the focus of these efforts was mainly to detect *Cochliomyia*  
74 *hominivorax* [11–13]. A series of experiments examining the interaction between the newly  
75 introduced *Chrysomya* sp. into the United States also recorded the presence of several blow flies  
76 in Central parts of Texas with traps as well [14,15] but the focus of these studies was not  
77 primarily for survey purposes.

78 Species records and trends related to casework have been published in other geographic  
79 areas. In North America these types of surveys have included the Hawaiian island of Oahu  
80 [16,17] and Western Canada [18]. These types of data are rarely published but are exceedingly  
81 important to understanding the local fauna important to casework in different geographic  
82 locations especially when practitioners may be reliant upon old and restricted taxonomic keys,  
83 which may not include all the species local to the area. To date no published data relating  
84 casework and the local forensically important insects in Texas or specifically in Harris County  
85 has been recorded. In this study the species, trends and seasonality of the forensically important  
86 insects associated with casework are reported for Harris County, Texas, USA. These data will  
87 aid in not only guiding identification and tracking of new species in the area but also in guiding  
88 research questions into the species of importance in this area. This study also allows for  
89 comparison with previous studies, particularly with respect to larger scale trends in insect  
90 colonization patterns such as indoor and outdoor scenes, seasonality and introduced species.

## 91 **MATERIALS AND METHODS**

92 **Casework** – Cases involving insect or related arthropod specimens collected and  
93 analyzed during the course of medicolegal death investigations performed by the Harris County  
94 Institute of Forensic Sciences (HCIFS) as dictated under Texas Code of Criminal Procedure  
95 49.25 [19], for the period of January 2013 through April 2016 (N = 203) were included in this

96 dataset. These cases involved the collection of specimens at the scene or during the autopsy and  
97 occasionally at both locations (Figure 1). The procedure for specimen collection follows standard  
98 operating procedures developed for the office. Briefly, this includes collection of representative  
99 insect and/or related arthropod specimens from representative locations on the body and scene  
100 representing the oldest identified life stages associated with the body. Specimens are divided into  
101 representative portions, preserved by the most appropriate method (e.g. hot water kill followed  
102 by 70% ethanol for larval fly specimens [20]) and reared to the adult stage, if possible, for  
103 confirmation of identification.

104 Identification of specimens is based on morphology using life stage and taxon appropriate  
105 taxonomic keys and literature, which are referenced in each individual report and the most  
106 frequently used publications are presented in Supplemental Table 1. Specialized keys and  
107 consultation with taxonomic experts are consulted as needed depending upon the specific case.  
108 Dr. T. Whitworth (Washington State University) also generously provided the HCIFS with a  
109 small adult reference blow fly (Diptera: Calliphoridae) collection in 2013 to facilitate  
110 identification of adult Calliphoridae specimens.

111 Cases that require only identification of specimens, such as for stinging insect cases, may  
112 not require further analysis, but a majority of cases require further analysis to estimate the age of  
113 the collected specimens and to provide a time of colonization (TOC) estimate. Larval Diptera  
114 and Coleoptera specimens are measured for length and each collected species is photographed  
115 for representative identifying features using a Keyence VHX-600 digital microscope with an  
116 attached VHX-S15E used as needed to stack images to enhance depth of field (Keyence Corp.,  
117 Itasca, IL, USA). The estimated age of the larvae is calculated using the accumulated degree  
118 hours (ADH) method [1,21] and taxon appropriate published development data for each species

119 using either published length data and/or development stage. Many scenes were located on  
120 private property with access granted by law enforcement. No protected species were collected.  
121 The completed TOC estimate and report for the specimens are included with the full autopsy  
122 report for each case involving the collection of entomology specimens.

123 During the course of scene investigation, temperature and humidity recordings are made  
124 using a combined thermometer-hygrometer (Fisher Scientific Education™, S66279, Fisher  
125 Scientific, Pittsburgh, PA, USA). Scene conditions such as location of the body with respect to  
126 shade or sun outdoors or thermostat settings indoors are also recorded to assist in the assessment  
127 of temperature modifications at the scene that might influence differences in temperature from  
128 the nearest weather station. Data is collected for ADH calculations from the nearest National  
129 Oceanic and Atmospheric Administration (NOAA) quality controlled weather station for each  
130 scene.

131 **Statistics** – Basic statistics were calculated for the forensic entomology cases where  
132 insects were collected from 2013 through April of 2016 (two cases were excluded as they  
133 reported on the absence of insects in the only two burial cases over the 3+ year period) for a total  
134 of 203 cases. Basic statistics (e.g. mean, standard deviation, count) were calculated for scene  
135 location (indoor, outdoor or hospital), month of scene investigation, length of TOC estimate,  
136 ambient scene temperature (°C), ambient scene relative humidity and the presence of insect  
137 species collected for each case (Table 1). Statistical comparisons of cases and case related factors  
138 (e.g. temperature differences by case type and species presence indoors vs. outdoors) were  
139 calculated using a Kruskal-Wallis  $X^2$  test for continuous data (e.g. ambient scene temperature,  
140 relative humidity and TOC estimate length) or an exact binomial test for categorical data (e.g.  
141 scene location) for species which were collected in five or more cases. All statistical calculations

142 and tests were computed using Microsoft Excel® and R 3.2.4 (R Team 2016) using the R  
143 Commander package [23].

## 144 **RESULTS AND DISCUSSION**

145 **Casework**– Perhaps the most important thing to consider when examining these data is  
146 that they represent casework and not the results of planned ecological study, which imposes  
147 certain limitations on the statistical analyses completed and the conclusions drawn. Of the 203  
148 cases analyzed, six were from hospitals without an associated scene investigation (3.0%), 65  
149 were from outdoor scenes (32.0%) and 132 were from indoor scenes (65.0%). Scene type  
150 appears to play a significant role in not only the species of insects encountered (Table 1) but in  
151 the conditions one may encounter during scene investigation (Table 2; Figure 1). It is also  
152 important to note that the scene conditions reported here do not necessarily represent the  
153 conditions experienced by the colonizing insects because these data were collected when insects  
154 were collected after some period of development. These data represent the conditions in which  
155 these insects might be found during the course of routine death investigations, which may be  
156 valuable to understanding the conditions under which insects colonize human remains; a goal of  
157 applied forensic entomology as it is used in casework.

### 158 **Scene Types**

159 **Hospitals** - Insect analysis involving hospital cases typically involved the identification  
160 of insects or insect artefacts such as honeybee (*Apis mellifera* L.) stingers (Table 1) rather than  
161 TOC estimation. In those cases where a TOC estimate was generated, the cases involved peri-  
162 mortem myiasis wherein the decedent was colonized by insects, namely flies (Diptera; Table 1),  
163 at some time point shortly before death. Estimation of TOC for decedents that come from the  
164 hospital with fly larvae allows for the determination of colonization that can account for myiasis.



165 Otherwise without any extenuating circumstances, such as a significant discrepancy between the  
166 stage of the insect larvae and the stage of decomposition or known medical history, myiasis can  
167 be overlooked [21]. Even when myiasis is known the calculation of the TOC estimate can be  
168 complicated by unknown factors related to which temperatures to use when calculating the  
169 accumulated degree hours (ADH) required for development [21]. This can be due to health  
170 related factors such as reduced circulation to extremities or due to unknown timing of demise  
171 and the switch from the use of body temperature to ambient temperature in calculations [24].

172 Appreciating the complications associated with temperature, TOC estimation using  
173 insects associated with wounds can provide useful information related to the timing of terminal  
174 events. For example if a wound, which has been colonized by insects, is associated with a fall, a  
175 TOC estimate may be a useful addition to the overall timeline of terminal events for the  
176 decedent. Timing of injuries can be difficult for individuals that have a delayed death as without  
177 scene details or witnesses the insects may provide the only timeline information available  
178 regarding injuries.

179 Thus far, the insects and arthropods associated with decedent's coming from the hospital  
180 have included honeybee, typical human parasites including lice and ticks, and blow flies (Table  
181 1). There is a growing appreciation for the information that these organisms can provide. As an  
182 example, a recent case demonstrated the potential of ticks to be useful to unraveling the travel  
183 history and potentially the next of kin (NOK) information for a decedent. In this case, a decedent  
184 came from the hospital emergency room with very little information, except that he had been  
185 traveling and had been dropped off at the hospital by a friend. The decedent had a partially  
186 engorged tick attached to his right ear that detached upon his arrival to the morgue and was  
187 quickly collected. This particular specimen was identified as a nymphal *Amblyomma* sp. most

188 likely *A. cajennense* or *A. imitator*, which both have a known distribution in South Texas,  
189 Mexico and Central America [25]. Once all the investigative information was put together, the  
190 range for the tick and the decedent's travel history matched. One can imagine in the absence of  
191 identification and/or NOK information that notice could be sent to consulate offices in the range  
192 of the tick to help in the search or for a decedent that is from within the United States to law  
193 enforcement agencies in the range of the tick species. One could also use the tick to test for tick-  
194 borne disease, potentially for surveillance or in determination of cause of death. Insects and other  
195 arthropods have the potential to help with a variety of other types of questions related to a  
196 decedent's life and death; therefore, collection of specimens, no matter how trivial, can  
197 sometimes prove to be incredibly useful to the investigation.

198       **Outdoor Scenes** –Cases involving specimens from decedents found outdoors primarily  
199 involve estimating TOC for the purposes of estimating PMI. This is the classic scenario in  
200 forensic entomology from which many of the protocols and standards were derived [26,27]. As  
201 we integrate forensic entomology into routine medicolegal death investigations we can  
202 appreciate the breadth of opportunities available for casework and applications of insects to  
203 death investigations [6]. Figure 1 illustrates the official manner of death classifications for  
204 HCIFS forensic entomology cases from January 2013 through April 2016. It shows that outdoor  
205 scenes are outnumbered by those that occur indoors. A majority of all of the cases involve  
206 natural manner of death classifications as the official manner of death. Initially these cases come  
207 into the morgue as undetermined cases due to the difficulty of assessing trauma of decomposing  
208 decedents. The number of cases involving undetermined, accident and suicide manners of death  
209 that involve insects and occur outdoors are approximately equal to those that occur indoors.  
210 These data suggest expanding forensic entomology tools and research to understanding insect

211 colonization indoors, which is an area of forensic entomology that has received comparatively  
212 less attention [28,29]. Noticeably, there are a higher percentage of homicide cases involving  
213 insects from decedents at scenes located outdoors than indoors. This is reflected in the initial  
214 development of forensic entomology tools for the outdoor scene as the initial opportunities of  
215 forensic entomology casework were to assist with homicide investigations [1]. It follows that  
216 decomposing decedents have fewer delays in colonization related to insect access and more  
217 opportunities for temperature modifications that may accelerate decomposition (e.g. direct sun  
218 exposure).

219 Analysis of factors associated with outdoor scenes in Harris County involves  
220 significantly higher average temperature (28.0°C; Table 3; Figure 2) but few other significant  
221 differences in the other factors observed when compared to indoor scenes (Table 3). The TOC  
222 estimates for outdoor scenes are slightly longer on average but not significantly different from  
223 those estimated from indoor scenes (Figure 3). Whereas the TOC estimates from hospitals were  
224 significantly shorter from both (Figure 3), which is most likely due to these cases being  
225 associated with known myiasis. Only one insect species was significantly associated with being  
226 encountered at outdoor scenes, the green bottle fly, *Lucilia eximia* (Table 4). All other insect  
227 groups, which were encountered in five or more cases, were either found to have a significantly  
228 higher probability to be encountered at indoor scenes or to be encountered at both indoor and  
229 outdoor scenes (Table 4). According to the binomial test, the probability of collecting *L. eximia*  
230 indoors is significantly lower than at an outdoor scene based on the data currently available in  
231 Harris County (Table 4). This suggests that finding this species on a decedent endorses outdoor  
232 colonization of the decedent when considered alone. However, three cases involved the  
233 collection of *L. eximia* at indoor scenes (Table 1) suggesting that under some circumstances this

234 species does colonize bodies located indoors. The combination of species encountered on a  
235 decedent may suggest movement of the decedent if for example, when *L. eximia* is found  
236 together with a strongly indoor colonizing species like *M. scalaris* (Table 4), but this may only  
237 be of importance when other scene indicators suggest this possibility. The opposite scenario may  
238 also be suggested if a strongly indoor colonizing species such as *M. scalaris* is found on a  
239 decedent located outdoors. However, it was not analyzed with these data but the combination of  
240 species found on the decedent may temper the strong association of certain species with outdoor  
241 locations as suggested by the small number of cases where *L. eximia* colonized indoors. In the  
242 casework analyzed here, it was actually more rare for bodies to be found to be colonized by a  
243 single insect species with only 14.2% (28 of 197) of cases found to have only a single colonizing  
244 species and the rest with more than one.

245 **Indoor Scenes** – Cases involving insects collected indoors also have a primary goal of  
246 TOC estimation for the purpose of estimating PMI. A majority of the forensic entomology case  
247 reports from Harris County over the analyzed period were from indoor scenes and they  
248 encompassed every manner of death classification except fetal (Figure 1). The average ambient  
249 scene temperature observed at indoor scenes (25.2°C) was significantly lower than that observed  
250 at outdoor scenes (Table 3; Figure 2). As mentioned earlier the number of cases that involve  
251 manner of death classifications involving accidents, suicides and undetermined classifications  
252 involve scenes located indoors and outdoors suggesting a need for more tools for indoor scenes.  
253 Indoor scenes can be complicated by multiple factors that affect insect colonization (e.g. delays  
254 in colonization; [28]), temperature modification (e.g. air conditioning, heating), co-located  
255 decomposing remains (e.g. decomposing pets; [30]), 24-hour lighting which may allow for  
256 nocturnal oviposition (e.g. a TV or lamp left on at the scene;[31]), other sources of insects in the

257 residence that may reduce or eliminate a delay in colonization (e.g. hoarding of trash and food)  
258 and a number of other case specific factors that may affect the TOC estimate. Many of these  
259 complicating factors have as yet unknown effects on TOC estimation but have the potential to  
260 have significant impacts on PMI estimation.

261 Another significant observation regarding indoor scenes is in the different insects found  
262 at indoor scenes. Just as some insect species appear to have preference for outdoor scenes there  
263 appears to be a strong association between indoor scenes and several insect groups including  
264 *Megaselia scalaris*, Sarcophagidae including *Blaesoxipha plinthopyga*, *Synthesiomyia nudiseta*  
265 and *Lucilia cuprina* as can be observed in the binomial test statistics presented in Table 4. This  
266 suggests when each of these species, considered alone, may represent an indicator of indoor  
267 colonization or at the very least allow for the consideration of an indoor scene from the insect's  
268 perspective. A car in a covered carport or a storage container where a decedent was living may  
269 not be what may typically be considered indoor scenes but from the insect's perspective, they  
270 may fulfill colonization preferences. Therefore, scene indicators and context should all be taken  
271 into account when considering insect specimens as indicators of body movement.

272 These results are similar to those observed by other researchers in other geographic  
273 locations. On the Hawaiian Island of Oahu, Goff [32] found that three species were strong  
274 indicators of indoor scenes including a species of the Phoridae *Megaselia scalaris*, the  
275 Sarcophagidae *Bercaea haemorrhoidalis* and the Muscidae *Stomoxys calcitrans*. While not  
276 exactly the same species encountered in the current study, a similar combination of  
277 representatives of the same fly families was found with the same Phoridae *M. scalaris*, the  
278 Sarcophagidae *B. plinthopyga* and the Muscidae *S. nudiseta* indicating indoor colonization. Goff  
279 also found that there was a wider diversity of fly species indoors at least preliminarily. In the

280 cases analyzed in this study there was a similar, though small, result with an average of 1.9 (+/-  
281 1.3 standard deviation) species of flies found from outdoor scenes and an average of 2.4 (+/-1.3  
282 standard deviation) fly species encountered in specimens from outdoor scenes overall. The  
283 Hawaiian study also reported a higher diversity of beetles encountered outdoors and this was also  
284 a trend that was observed in the current study although beetles were more rarely collected (Table  
285 1). In Western Canada Anderson [28] found that most of the blow fly species colonizing  
286 experimentally placed pigs indoors and outdoors overlapped with several species appearing to be  
287 restricted to the outdoors. Similar results were obtained in this study where the only species that  
288 was strongly associated with outdoor scenes was *L. eximia* (Table 1 and 4). However, in an  
289 analysis of casework Anderson [18] found that in British Columbia, Sarcophagidae and Phoridae  
290 did not appear to be significant colonizers and did not appear to have the same dichotomy based  
291 on scene location. When one considers the climate similarities and differences among the three  
292 geographic locations, such as the temperatures, relative humidity (Table 2) and precipitation  
293 encountered at scenes in Harris County along the Gulf Coast are perhaps more similar to those  
294 encountered in Hawaii rather than British Columbia. Furthermore climate change may lead to  
295 changes in species ranges over time [33,34] or to differentiation in developmental progression in  
296 different populations of the same species. This highlights the necessity and importance of  
297 collecting and publishing these data for different geographic locations, different climatic regions  
298 and different species assemblages rather than relying only on a handful of studies.

299         Some species of insects and arthropods analyzed in Harris County casework have only  
300 been found indoors thus far. The flesh fly *Blaesoxipha plinthopyga* is the only fly, which has  
301 been identified exclusively indoors. This fly was not known to be a forensically significant fly in  
302 the US until quite recently [35] and this is perhaps due in part to the difficulty in identification of

303 Sarcophagidae, which requires either prepared adult male flies [36] and expert morphological  
304 expertise associated with male genitalia or expertise in the molecular systematics of  
305 Sarcophagidae [37,38] and adequate laboratory capacity. Therefore, Sarcophagidae have often  
306 been relegated to the Family level without further identification. Nevertheless, even with  
307 identification there are significant gaps in the literature for detailed development data sets for  
308 many of the forensically important Sarcophagidae species. The mite, *Myianoetus muscuarum*,  
309 has only been found indoors but it has only been found in a few cases thus far ([39] and Table 1)  
310 and it may be the case that the more it is looked for the more it may be found. The other species  
311 that have been found exclusively indoors have very low case numbers and may have just not  
312 been collected frequently enough to establish habitat or colonization preferences for these  
313 insects/arthropods (Table 1).

#### 314 **Insects/Arthropods**

315 The introduction of routine forensic entomology into the Medical Examiner's office has  
316 allowed for the observation of several new associations between insects, arthropods and human  
317 decomposition. One of those observations was the first report of what was determined to be  
318 myiasis of a decedent shortly before his death by *L. eximia* and *C. rufifacies* for the first time on  
319 a human in the US [40]. In another case, the blue blow fly, *Calliphora coloradensis* was  
320 collected from an outdoor scene in February 2014, associated with a decedent in an advanced  
321 state of decomposition and vertebrate scavenging. The specimen was reared from a pupa located  
322 next to the decedent and it was the first time that this species had been collected from a decedent.  
323 It is known to occur in Texas [15] but has not to the author's knowledge, been collected in  
324 association with a decomposing human in Harris County. It has been previously recorded as an  
325 adult associated with a human corpse found at high elevation in Colorado but was not observed  
326 as a colonizer of the remains [41]. In another case the tawny crazy ant, *Nylanderia fulva* was

327 recorded on a decomposing human body in Harris County for what appears to be the first time  
328 (Table 1).

329         Aside from new insect associations, other new arthropod associations are being made as  
330 well. The mite, *M. muscuarum* was recently established to have a relationship with *S. nudiseta* at  
331 indoor scenes [39] and has been found in additional cases since this publication was completed.  
332 Mites continue to be encountered at scenes and with help of Dr. B. OConnor (University of  
333 Michigan), identifications of the mite species are being made in order to develop a taxonomic  
334 index and to be able to associate the mite fauna with timing in the decomposition process for this  
335 geographic location. A nematode was recently found in association with decomposing decedents  
336 found in advanced stages of decomposition located indoors. These nematodes were first  
337 discovered in a rearing container from a case involving a decedent found in an advanced state of  
338 decomposition in a hoarder home. The decedent was also colonized by Sarcophagidae,  
339 Calliphoridae and *Hermetia illucens*. Rearing of the specimens to confirm identifications led to  
340 the discovery of large numbers of nematodes in the rearing container. The identity of these  
341 nematodes was difficult as they may represent a new species and their identity is still being  
342 investigated by Dr. Y. Qing (Canadian National Collection of Nematodes).

343         The location of Harris county being on the Gulf Coast and near the southern US border  
344 presents the opportunity to make observations related to new species introductions as well as  
345 documenting new associations. The forensic entomologist can therefore serve in a capacity to  
346 identify foreign species introductions and to notify relevant interested parties. This applies to not  
347 only those insects that are used for TOC estimation but also those that may be relevant to public  
348 health and cause of death determination as new arthropod-borne diseases are introduced to the  
349 US.



## 350 **Seasonality**

351           The seasonality of the blow flies encountered in Harris County follows patterns generally  
352 accepted for Calliphoridae in North America [42]. The typical cool weather blue bottle flies,  
353 *Calliphora* spp. are found in the winter months and other species such as the black blow fly, *P.*  
354 *regina*, and the Muscidae species, *S. nudiseta* are active in the spring months (Table 1). The  
355 green/bronze bottle flies, *Lucilia* spp. are most often collected in the hot summer months but can  
356 be encountered throughout the spring through the fall months (Table 1). The introduced species,  
357 the hairy maggot blow fly, *Chrysomya rufifacies* and the oriental latrine fly, *Chrysomya*  
358 *megacephala* appear to be active year-round in some years whereas in other years they can be  
359 absent in the winter months (Table 1). It is a very rare occurrence for there to be snow in Harris  
360 County and temperatures below 0.0°C rarely persist for more than a few days if at all [43]. These  
361 climate characteristics probably help the introduced tropical Calliphoridae species persist  
362 through the winter as freezing temperatures are thought to restrict their distribution in North  
363 America [44].

364           The Sarcophagidae species, *B. plinthopyga*, and the Phoridae species, *M. scalaris*, are not  
365 as seasonally restricted and appear to be collected in casework year-round (Table 1). It would  
366 seem that this might be partially explained by their exploitation of indoor scenes. Currently no  
367 data is available on the dispersal patterns of either of these fly species. Other Phoridae species  
368 appear to be capable of transportation via wind and human modes of transport [45]. Preliminary  
369 data suggests population structure exists within *M. scalaris* populations in the US even across  
370 relatively small geographic distances [46]. Indoor environments with their cooler and less

371 variable temperature range (Figure 2) may offer refuge when outdoor conditions are unfavorable  
372 allowing populations to persist locally during bad weather.

### 373 **CONCLUSIONS**

374 The integration of full time forensic entomology services to the medical examiner's  
375 office in Harris County has revealed new observations, confirmed long-standing hypotheses and  
376 opened up a wide range of new opportunities. The casework described here is not an endpoint  
377 and new species observations and associations continue to be revealed. This study represents a  
378 reference point from which to describe additional observations and trends and from which to  
379 compare other geographic locations and species assemblages. These data also remind us that  
380 depending upon generalizations and assumptions can be misleading and that keeping an open  
381 mind and collecting something that may at first seem trivial may prove to be exceptionally  
382 useful.

383 The data presented here also have illustrated several persistent issues in the application of  
384 forensic entomology to casework. While molecular identification tools are being more widely  
385 developed and applied to morphologically difficult groups (e.g. Sarcophagidae and Muscidae)  
386 there are significant gaps in development data sets. A single development data set is available for  
387 *B. plinthopyga* which was never intended for use in application to forensic entomology as it is  
388 includes total generation time for specimens collected during a study of diapause [47]. Yet this  
389 species is considerably important to casework in Harris County (Table 1). There are no known  
390 published development data sets for *C. coloradensis*, *C. livida* or *D. maculatus* using a diet that  
391 approximates human tissue. The suggested practice of using closely related species to  
392 approximate development for those species that have missing data introduces unnecessary  
393 uncertainty in an estimate of TOC and its application to PMI. Furthermore there is growing

394 awareness that different populations of the same species have different developmental responses  
395 to the same temperatures over large [48] and relatively small geographic distances [49]. This  
396 strongly suggests that using development datasets from populations not local to the collection  
397 location for the case may introduce unwelcome uncertainty to a case that becomes difficult to  
398 track and account for once the case has been filed. Several of the species that are common and  
399 important to casework in Harris County lack local development data sets including *C.*  
400 *megacephala*, *S. nudiseta*, *L. eximia* and *L. cuprina*.

401 While missing development datasets can be generated, other issues continue to haunt  
402 forensic entomology casework that are not and will not be as easy to remedy. In 1992, Catts [50]  
403 outlined several complications in using insects to estimate postmortem interval. These issues,  
404 such as maggot mass heat, insect access and entomotoxicology, continue to be sources of  
405 uncertainty for the application of forensic entomology to casework. It has only been relatively  
406 recently that there has been an increased awareness for the need to account for uncertainty and  
407 sources of error in forensic entomology within the context of all forensic sciences in the US [51].  
408 In addition, while identifying potential sources of error is more widely appreciated accounting  
409 for how these errors and influences impact individual TOC and PMI estimates has not yet been  
410 resolved. Tackling these challenges in forensic entomology will require strong collaboration  
411 between academic and practitioner parts of the community but the results will make forensic  
412 entomology an even more powerful tool in understanding the post-mortem interval.

#### 413 **ACKNOWLEDGEMENTS**

414 The author would like to acknowledge the help of Drs. Barry OConnor (Acari; University of  
415 Michigan), Terry Whitworth (Calliphoridae; University of Washington), Martin B. Berg  
416 (Chironomidae; Loyola University), Robert Puckett (Formicidae; Texas A&M University), Pete

417 Teel (Ixodidae; Texas A&M University), Qing Yu (Nematoda; Canadian National Collection of  
418 Nematodes), Brian Brown (Phoridae; Natural History Museum of Los Angeles) and Greg  
419 Dahlem (Sarcophagidae; Northern Kentucky University) for their generous assistance with  
420 identification of specimens from their respective taxonomic specialties. The help of these  
421 taxonomic experts adds valuable taxonomic information to not only casework reports but to the  
422 body of knowledge regarding insects and associated arthropods found on decomposing human  
423 remains. The author also wishes to thank Drs. Jeffery Tomberlin, Adrienne Brundage, Micah  
424 Flores and Gail Anderson for their assistance in implementing and maintaining 100% outside  
425 peer review of forensic entomology casework for the Harris County Institute of Forensic  
426 Sciences (HCIFS). This could not have been accomplished without their gracious voluntary  
427 service to this effort. The author also wishes to acknowledge the forensic pathologists and  
428 forensic investigators of the HCIFS for their support in embracing insects in their day-to-day  
429 activities. The integration of forensic entomology into the daily activities of the medical  
430 examiner's office has greatly benefitted the field and will continue to do so in the future.

431

432 **REFERENCES CITED**

- 433 1. Catts EP, Goff ML. Forensic entomology in criminal investigations. *Annu Rev Entomol.*  
434 1992;37: 253–272.
- 435 2. Byrd JH, Castner JL. *Forensic Entomology: The Utility of Arthropods in Legal*  
436 *Investigations, Second Edition.* 2nd ed. Byrd JH, Castner JL, editors. Boca Raton, FL:  
437 Taylor & Francis; 2009. doi:10.4001/003.018.0221
- 438 3. Joseph I, Mathew DG, Sathyan P, Vargheese G. The use of insects in forensic  
439 investigations: An overview on the scope of forensic entomology. *J Forensic Dent Sci.*  
440 India: Medknow Publications & Media Pvt Ltd; 2011;3: 89–91. doi:10.4103/0975-  
441 1475.92154
- 442 4. Winkley L. How insects help solve murders. Bugs can tell forensic entomologists if a  
443 body’s been moved, and bust alibis. *The San Diego Union-Tribune.* 2015.
- 444 5. Smith KG V. *A Manual of Forensic Entomology.* 1st ed. Ithaca, N.Y.: Cornell University  
445 Press; 1986.
- 446 6. Sanford MR. Forensic Entomology in the Medical Examiner’s Office. *Acad Forensic*  
447 *Pathol. Academic Forensic Pathology, Inc.;* 2015;5: 306.
- 448 7. Hwang C, Turner BD, Monitoring D, County C. Spatial and temporal variability of  
449 necrophagous Diptera from urban to rural areas. *Med Vet Entomol.* 2005;19: 379–391.  
450 doi:10.1111/j.1365-2915.2005.00583.x
- 451 8. Carvalho LML, Thyssen PJ, Linhares AX, Palhares FAB. A Checklist of Arthropods  
452 Associated with Pig Carrion and Human Corpses in Southeastern Brazil. *Mem Inst*  
453 *Oswaldo Cruz.* 2000;95: 135–138.

- 454 9. Tenorio FM, Olson JK, Coates CJ. Decomposition studies, with a catalog and descriptions  
455 of forensically important blow flies (Diptera: Calliphoridae) in Central Texas. Southwest  
456 Entomol. 2003;28: 267–272.
- 457 10. Goddard J. Blow fly bait preferences and seasonal activity in Bexar County, Texas.  
458 Southwest Entomol. 1988;13: 131–135.
- 459 11. Snow JW, Coppedge JR, Broce AB, Goodenough JL, Brown HE. Swormlure:  
460 Development and use in detection and suppression systems for adult screwworm (Diptera:  
461 Calliphoridae). Bull Entomol Soc Am. 1982;28: 277–284.
- 462 12. Coppedge JR, Ahrens EH, Snow JW. Swormlure-2 baited traps for detection of native  
463 screwworm flies. J Econ Entomol. 1978;71: 573–575.
- 464 13. Richard RD, Ahrens EH. New distribution record for the recently introduced blow fly  
465 *Chrysomya rufifacies* (Macquart) in North America. Southwest Entomol. 1983;8: 216–  
466 218.
- 467 14. Wells JD, Greenberg B. Resource use by an introduced and native carrion flies.  
468 Oecologia. 1994;99: 181–187. doi:10.1007/BF00317099
- 469 15. Wells JD, Greenberg B. Effect of the Red Imported Fire Ant (Hymenoptera Formicidae)  
470 and carcass type on the daily occurrence of postfeeding carrion-fly larvae (Diptera:  
471 Calliphoridae, Sarcophagidae). J Med Entomol. 1994;31: 171–174.
- 472 16. Early M, Goff ML. Arthropod succession patterns in exposed carrion on the island of  
473 Oahu, Hawaiian Islands, USA. J Med Entomol. Entomological Society of America;  
474 1986;23: 520–531.
- 475 17. Goff ML, Early M, Odom CB, Tullis K. A preliminary checklist of arthropods associated

- 476 with exposed carrion in the Hawaiian Islands. Proc Hawaiian Entomol Soc. 1986;26: 53–  
477 57.
- 478 18. Anderson GS. The use of insects in death investigations: an analysis of cases in British  
479 Columbia over a five year period. J Can Soc Forensic Sci. 1995;28: 277–292.  
480 doi:10.1080/00085030
- 481 19. Chapter 49. Inquests upon dead bodies. Title 1 Code of Criminal Procedure. State of  
482 Texas; 1965. Available: <http://www.statutes.legis.state.tx.us/Docs/CR/htm/CR.49.htm>
- 483 20. Adams Z, Hall MJR. Methods used for the killing and preservation of blowfly larvae, and  
484 their effect on post-mortem larval length. Forensic Sci Int. 2003;138: 50–61.  
485 doi:10.1016/j.forsciint.2003.08.010
- 486 21. Wells JD, Lamotte LR. Estimating the postmortem interval. In: Byrd JH, Castner JL,  
487 editors. Forensic Entomology: The Utility of Arthropods in Legal Investigations. Second.  
488 Boca Raton, FL: CRC Press; 2010. pp. 367–388.
- 489 22. Core Team R, Team RC. R: A language and environment for statistical computing  
490 [Internet]. Vienna, Austria: R Foundation for Statistical Computing; 2016. Available:  
491 <https://www.r-project.org>
- 492 23. Fox J. The R Commander. A Basic Statistics Graphical User Interface to R. J Stat Softw.  
493 2005;14: 1–42.
- 494 24. Sanford MR, Whitworth TL, Phatak DR. Human wound colonization by *Lucilia eximia*  
495 and *Chrysomya rufifacies* (Diptera: Calliphoridae). Myiasis, perimortem or postmortem  
496 colonization? J Med Entomol. 2014;51: 716–719. doi:10.1603/ME13229
- 497 25. Keirans JE, Durden LA. Illustrated key to nymphs of the tick genus *Amblyomma* (Acari:

- 498 Ixodidae) found in the United States. *J Med Entomol.* 1998;35: 489–495.
- 499 26. Haskell NH, Williams RE. Collection of entomological evidence at the death scene. In:  
500 Catts EP, Haskell NH, editors. *Entomology & Death: A Procedural Guide*. Clemson, SC:  
501 Joyce's Print Shop; 1990. pp. 82–97.
- 502 27. Byrd JH, Lord WD, Wallace JR, Tomberlin JK. Collection of entomological evidence  
503 during legal investigations. In: Byrd JH, Castner JL, editors. *Forensic Entomology: The*  
504 *Utility of Arthropods in Legal Investigations*. Second. Boca Raton, FL: CRC Press; 2010.  
505 pp. 127–175.
- 506 28. Anderson GS. Comparison of decomposition rates and faunal colonization of carrion in  
507 indoor and outdoor environments. *J Forensic Sci.* 2011;56: 136–42. doi:10.1111/j.1556-  
508 4029.2010.01539.x
- 509 29. Reibe S, Madea B. How promptly do blowflies colonise fresh carcasses? A study  
510 comparing indoor with outdoor locations. *Forensic Sci Int.* 2010;195: 52–7.  
511 doi:10.1016/j.forsciint.2009.11.009
- 512 30. Sanford MR. Forensic entomology of decomposing humans and their decomposing pets.  
513 *Forensic Sci Int.* Elsevier Ireland Ltd; 2015;247: e11–e17.  
514 doi:10.1016/j.forsciint.2014.11.029
- 515 31. Greenberg B. Nocturnal oviposition behavior of blow flies (Diptera: Calliphoridae). *J Med*  
516 *Entomol.* 1990;27: 807–810.
- 517 32. Goff ML. Comparison of insect species associated with decomposing remains recovered  
518 inside dwellings and outdoors on the island of Oahu, Hawaii. *J Forensic Sci.* 1991;36:  
519 748–753.



- 520 33. Turchetto M, Vanin S. Forensic entomology and climatic change. *Forensic Sci Int.*  
521 2004;146 Suppl: S207-9. Available: <http://www.ncbi.nlm.nih.gov/pubmed/15639577>
- 522 34. Picard CJ. First record of *Chrysomya megacephala* Fabricius (Diptera: Calliphoridae) in  
523 Indiana, USA. *Proc Entomol Soc Washingt.* 2013;115: 265–267.
- 524 35. Wells JD, Smith JL. First report of *Blaesoxipha plinthopyga* (Diptera: Sarcophagidae)  
525 from a human corpse in the USA and a new geographic record based on specimen  
526 genotype. *J Forensic Sci.* 2013;58: 1378–1380. doi:10.1111/1556-4029.12246
- 527 36. Dahlem GA, Naczi RFC. Flesh flies (Diptera: Sarcophagidae) associated with North  
528 American pitcher plants (Sarraceniaceae), with descriptions of three new species. *Ann*  
529 *Entomol Soc Am.* 2006;99: 218–240. doi:10.1603/0013-  
530 8746(2006)099[0218:FFDSAW]2.0.CO;2
- 531 37. Zehner R, Amendt J, Schütt S, Sauer J, Krettek R, Povolný D. Genetic identification of  
532 forensically important flesh flies (Diptera: Sarcophagidae). *Int J Legal Med.* 2004;118:  
533 245–247. doi:10.1007/s00414-004-0445-4
- 534 38. Stamper T, Dahlem G a., Cookman C, Debry RW. Phylogenetic relationships of flesh flies  
535 in the subfamily Sarcophaginae based on three mtDNA fragments (Diptera:  
536 Sarcophagidae). *Syst Entomol.* 2013;38: 35–44. doi:10.1111/j.1365-3113.2012.00646.x
- 537 39. Pimsler ML, Owings CG, Sanford MR, OConnor BM, Teel PD, Mohr RM, et al.  
538 Association of *Myianoetus muscarum* (Acari: Histiostomatidae) with *Synthesiomyia*  
539 *nudiseta* (Wulp) (Diptera: Muscidae) on human remains. *J Med Entomol.* 2016;53: 290–  
540 295. doi:<http://dx.doi.org/10.1093/jme/tjv203>
- 541 40. Sanford MR, Whitworth TL, Phatak DR. Human wound colonization by *Lucilia eximia*

- 542 and *Chrysomya rufifacies* (Diptera: Calliphoridae): myiasis, perimortem, or postmortem  
543 colonization? J Med Entomol. The Oxford University Press; 2014;51: 716–719.
- 544 41. Adair TW, Kondratieff BC. Three species of insects collected from an adult human corpse  
545 above 3300 m in elevation: a review of a case from Colorado. J Forensic Sci. 2006;51:  
546 1164–1165. doi:10.1111/j.1556-4029.2006.00236.x
- 547 42. Norris KR. The Bionomics of Blow Flies. Annu Rev Entomol. 1965;10: 47–68.  
548 doi:10.1146/annurev.en.10.010165.000403
- 549 43. Webmaster H. Climate Pages for College Station (CLL) Houston Intercontinental (IAH)  
550 Houston Hobby (HOU) Galveston (GLS). In: National Weather Service Weather Forecast  
551 Office - Houston/Galveston, TX [Internet]. 2016 [cited 11 Jul 2016]. Available:  
552 [http://www.srh.noaa.gov/hgx/?n=climate\\_graphs](http://www.srh.noaa.gov/hgx/?n=climate_graphs)
- 553 44. Baumgartner DL. Review of *Chrysomya rufifacies* (Diptera: Calliphoridae). J Med  
554 Entomol. 1993;30: 338–352. Available: <http://www.ncbi.nlm.nih.gov/pubmed/8459410>
- 555 45. Disney RHL. Scuttle Flies: The Phoridae. Dordrecht: Springer Netherlands; 1994.
- 556 46. Lesavoy BS, McGaugh SE, Noor MAF. Mitochondrial DNA variation and structure  
557 among North American populations of *Megaselia scalaris*. bioRxiv. 2014;pre-print.  
558 doi:<http://dx.doi.org/10.1101/006288>
- 559 47. Denlinger DL, Chen CP, Tanaka S. The impact of diapause on the evolution of other life  
560 history traits in flesh flies. Oecologia. 1988;77: 350–356. doi:10.1007/BF00378041
- 561 48. Gallagher MB, Sandhu S, Kimsey R. Variation in developmental time for geographically  
562 distinct populations of the common green bottle fly, *Lucilia sericata* (Meigen). J Forensic  
563 Sci. 2010;55: 438–442. doi:10.1111/j.1556-4029.2009.01285.x

- 564 49. Owings CG, Spiegelman C, Tarone AM, Tomberlin JK. Developmental variation among  
565 *Cochliomyia macellaria* Fabricius (Diptera: Calliphoridae) populations from three  
566 ecoregions of Texas, USA. *Int J Legal Med.* 2014;128: 709–717. doi:10.1007/s00414-  
567 014-1014-0
- 568 50. Catts EP. Problems in Estimating the Postmortem Interval. *J Agric Entomol.* 1992;9: 245–  
569 255.
- 570 51. Council NR, National Research Council. Strengthening Forensic Science in the United  
571 States: A Path Forward [Internet]. Washington, D.C.: National Research Council of the  
572 National Academies; 2009. doi:<http://www.nap.edu/catalog/12589.html>
- 573

|                                                          | <u>N</u>         |                       | <u>Jan</u>        | <u>Feb</u>        | <u>Mar</u>        | <u>Apr</u>        | <u>May</u>        | <u>Jun</u>        | <u>Jul</u>        | <u>Aug</u>        | <u>Sep</u>        | <u>Oct</u>        | <u>Nov</u>        | <u>Dec</u>        |
|----------------------------------------------------------|------------------|-----------------------|-------------------|-------------------|-------------------|-------------------|-------------------|-------------------|-------------------|-------------------|-------------------|-------------------|-------------------|-------------------|
| <b>Scene Type: Hospital</b>                              | <b>6</b>         |                       |                   |                   |                   |                   |                   |                   |                   |                   |                   |                   |                   |                   |
| <b>Species</b>                                           |                  |                       |                   |                   |                   |                   |                   |                   |                   |                   |                   |                   |                   |                   |
| <b>Diptera: Calliphoridae</b>                            | <b>3</b>         |                       |                   |                   |                   |                   |                   |                   |                   |                   |                   |                   |                   |                   |
| - <i>Chrysomya rufifacies</i>                            | <b>1</b>         |                       |                   |                   |                   |                   |                   | A                 |                   |                   |                   |                   |                   |                   |
| - <i>Lucilia eximia</i>                                  | <b>2</b>         |                       |                   |                   |                   |                   |                   | A                 | B                 |                   |                   |                   |                   |                   |
| <b>Hymenoptera: Apidae</b>                               |                  |                       |                   |                   |                   |                   |                   |                   |                   |                   |                   |                   |                   |                   |
| - <i>Apis mellifera</i>                                  | <b>2</b>         |                       |                   |                   |                   | A                 |                   |                   |                   |                   |                   | B                 |                   |                   |
| <b>Pthiraptera: Pulicidae</b>                            |                  |                       |                   |                   |                   |                   |                   |                   |                   |                   |                   |                   |                   |                   |
| - <i>Pediculus humanus</i>                               | <b>1</b>         |                       |                   |                   |                   |                   |                   | A                 |                   |                   |                   |                   |                   |                   |
| <b>Acari: Ixodidae</b>                                   |                  |                       |                   |                   |                   |                   |                   |                   |                   |                   |                   |                   |                   |                   |
| - <i>Amblyomma imitator</i> or <i>cajennense</i> (nymph) | <b>1</b>         |                       |                   |                   |                   |                   |                   |                   |                   | A                 |                   |                   |                   |                   |
| <b>Scene Type: Scene</b>                                 | <b><u>N</u></b>  | <b><u>N</u></b>       | <b><u>Jan</u></b> | <b><u>Feb</u></b> | <b><u>Mar</u></b> | <b><u>Apr</u></b> | <b><u>May</u></b> | <b><u>Jun</u></b> | <b><u>Jul</u></b> | <b><u>Aug</u></b> | <b><u>Sep</u></b> | <b><u>Oct</u></b> | <b><u>Nov</u></b> | <b><u>Dec</u></b> |
|                                                          | <b><u>In</u></b> | <b><u>Out</u></b>     |                   |                   |                   |                   |                   |                   |                   |                   |                   |                   |                   |                   |
| <b>Diptera: Sarcophagidae</b>                            | <b>85</b>        | <b>8</b>              | ABCD              | ABCD              | ABCD              | ABCD              | ABC               | ABC               | BC                | ABC               | ABC               | ABC               | ABC               | ABC               |
| - <i>Blaesoxipha plinthopyga</i> <sup>1</sup>            | <b>37</b>        | <b>0</b> <sup>1</sup> | BC                | BC                | BCD               | C                 | AB                | C                 | C                 | BC                | AC                | AC                | AB                | A                 |
| <b>Diptera: Phoridae</b>                                 | <b>60</b>        | <b>2</b>              |                   |                   |                   |                   |                   |                   |                   |                   |                   |                   |                   |                   |
| - <i>Megaselia scalaris</i>                              | <b>59</b>        | <b>2</b>              | ABC               | ABCD              | ABC               | ACD               | AB                | ABC               | BC                | AC                | ABC               | ABC               | ABC               | ABC               |
| - <i>Dorniphora cornuta</i> <sup>2</sup>                 | <b>1</b>         | <b>0</b>              |                   |                   |                   |                   |                   |                   |                   |                   |                   |                   |                   | B                 |
| <b>Diptera: Calliphoridae</b>                            | <b>64</b>        | <b>56</b>             | AD                | ACD               | ABCD              | ABCD              | ABC               | ABC               | ABC               | ABC               | ABC               | ABC               | ABC               | ABC               |
| - <i>Phormia regina</i>                                  | <b>12</b>        | <b>8</b>              | D                 | ACD               | ABCD              | ABCD              |                   | B                 | C                 |                   |                   | C                 |                   | ABC               |
| - <i>Cochliomyia macellaria</i>                          | <b>17</b>        | <b>20</b>             | D                 | A                 | D                 | ABCD              | BC                | ABC               | ABC               | C                 | BC                | B                 |                   | C                 |
| - <i>Chrysomya rufifacies</i>                            | <b>34</b>        | <b>36</b>             | AD                | AC                | ACD               | D                 | AC                | ABC               | ABC               | ABC               | ABC               | AC                | BC                | ABC               |
| - <i>Chrysomya megacephala</i>                           | <b>21</b>        | <b>19</b>             |                   | A                 | AD                | ACD               |                   | ABC               | ABC               | AC                | ABC               | ABC               | A                 | ABC               |
| - <i>Lucilia eximia</i>                                  | <b>3</b>         | <b>17</b>             |                   |                   | D                 | B                 | AC                | AB                |                   | C                 | AB                |                   | ABC               | B                 |
| - <i>Lucilia cuprina</i>                                 | <b>8</b>         | <b>1</b>              |                   |                   | C                 | ABD               | A                 |                   |                   |                   |                   | B                 |                   | A                 |
| - <i>Lucilia sericata</i>                                | <b>1</b>         | <b>0</b>              |                   |                   |                   | A                 |                   |                   |                   |                   |                   |                   |                   |                   |
| - <i>Calliphora vomitoria</i>                            | <b>0</b>         | <b>2</b>              |                   | A                 |                   |                   |                   |                   |                   |                   |                   |                   |                   | B                 |
| - <i>Calliphora livida</i>                               | <b>0</b>         | <b>1</b>              | D                 | C                 |                   |                   |                   |                   |                   |                   |                   |                   |                   |                   |
| - <i>Calliphora coloradensis</i>                         | <b>0</b>         | <b>1</b>              |                   | C                 |                   |                   |                   |                   |                   |                   |                   |                   |                   |                   |
| - <i>Calliphora vicina</i>                               | <b>1</b>         | <b>0</b>              |                   |                   | D                 |                   |                   |                   |                   |                   |                   |                   |                   |                   |

|                                            | <u>N</u><br><u>In</u> | <u>N</u><br><u>Out</u> | <u>Jan</u> | <u>Feb</u> | <u>Mar</u> | <u>Apr</u> | <u>May</u> | <u>Jun</u> | <u>Jul</u> | <u>Aug</u> | <u>Sep</u> | <u>Oct</u> | <u>Nov</u> | <u>Dec</u> |
|--------------------------------------------|-----------------------|------------------------|------------|------------|------------|------------|------------|------------|------------|------------|------------|------------|------------|------------|
| <b>Diptera: Muscidae</b>                   | <b>20</b>             | <b>14</b>              | B          | C          | AB         | ABC        | AB         | A          | BC         | B          | C          | C          | BC         | AB         |
| - <i>Synthesiomyia nudiseta</i>            | 9                     | 1                      | BD         | CD         | D          |            | AB         |            | C          | B          |            | C          | BC         |            |
| - <i>Musca domestica</i>                   | 4                     | 1                      |            |            | A          | AB         | A          |            |            |            |            |            |            | A          |
| - <i>Hydrotea</i> sp.                      | 7                     | 10                     | D          | CD         | BD         | ABC        |            | A          | BC         | B          | C          | C          | C          | B          |
| - <i>Fannia scalaris</i>                   | 0                     | 1                      |            |            |            |            |            | A          |            |            |            |            |            |            |
| <b>Diptera: Piophilidae</b>                |                       |                        |            |            |            |            |            |            |            |            |            |            |            |            |
| - <i>Piophila casei</i>                    | 2                     | 4                      |            |            |            | BD         | A          | A          | C          |            |            |            | C          |            |
| <b>Diptera: Stratiomyidae</b>              |                       |                        |            |            |            |            |            |            |            |            |            |            |            |            |
| - <i>Hermetia illucens</i>                 | 2                     | 6                      |            | A          |            |            |            |            | BC         |            |            | C          |            | BC         |
| <b>Diptera: Anthomyiidae</b>               | <b>0</b>              | <b>1</b>               | A          |            |            |            |            |            |            |            |            |            |            |            |
| <b>Diptera: Sepsidae</b>                   | <b>0</b>              | <b>1</b>               | A          |            |            |            |            |            |            |            |            |            |            |            |
| <b>Diptera: Drosophilidae</b>              | <b>1</b>              | <b>0</b>               |            |            |            |            |            |            |            |            |            |            |            | C          |
| <b>Diptera: Chironomidae</b>               | <b>0</b>              | <b>1</b>               |            |            |            |            |            |            |            |            |            |            |            |            |
| - <i>Goelichironomus holoprasinus</i>      | 0                     | 1                      |            |            |            |            |            |            |            |            | B          |            |            |            |
| - <i>Polypedilium flavum</i>               | 0                     | 1                      |            |            |            |            |            |            |            |            | B          |            |            |            |
| - <i>Chironomus</i> sp.                    | 0                     | 1                      |            |            |            |            |            |            |            |            | B          |            |            |            |
| <b>Diptera: Tachnidae</b>                  | <b>0</b>              | <b>1</b>               |            |            |            |            |            |            |            |            | C          |            |            |            |
| <b>Diptera: Psychodidae</b>                |                       |                        |            |            |            |            |            |            |            |            |            |            |            |            |
| - <i>Psychoda</i> sp.                      | 0                     | 1                      |            |            |            |            |            |            | C          |            |            |            |            |            |
| <b>Coleoptera: Dermestidae</b>             | <b>8</b>              | <b>11</b>              | AD         | A          | D          | BD         | AB         | A          | ABC        | BC         |            | C          | BC         | A          |
| - <i>Dermestes maculatus</i>               | 6                     | 7                      |            |            |            | D          | AB         | A          | ABC        | B          | C          | C          | C          | A          |
| <b>Coleoptera: Nitidulidae</b>             |                       |                        |            |            |            |            |            |            |            |            |            |            |            |            |
| - <i>Omosita</i> sp.                       | 0                     | 5                      |            |            |            |            |            | A          | C          |            |            | C          | C          | A          |
| <b>Coleoptera: Histeridae</b> <sup>3</sup> | <b>1</b>              | <b>3</b>               |            |            | A          |            | A          | A          |            | A          |            |            |            |            |
| <b>Coleoptera: Silphidae</b> <sup>3</sup>  | <b>0</b>              | <b>2</b>               |            | A          |            |            |            |            |            |            |            |            |            | B          |
| <b>Coleoptera: Cleridae</b> <sup>3</sup>   | <b>3</b>              | <b>0</b>               |            |            |            |            |            | A          |            |            |            |            |            |            |
| <b>Coleoptera: Staphylinidae</b>           | <b>0</b>              | <b>1</b>               |            | D          |            |            |            |            |            |            |            |            |            |            |
| <b>Coleoptera: Tenebrionidae</b>           | <b>0</b>              | <b>1</b>               |            |            |            |            | A          |            |            |            |            |            |            |            |
| <b>Coleoptera: Carabidae</b>               | <b>0</b>              | <b>1</b>               |            |            |            |            |            |            |            | B          |            |            |            |            |
| <b>Coleoptera: Elateridae</b>              | <b>0</b>              | <b>2</b>               |            |            |            |            |            |            | C          |            |            |            |            | B          |

|                                              | <u>N</u><br><u>In</u> | <u>N</u><br><u>Out</u> | <u>Jan</u> | <u>Feb</u> | <u>Mar</u> | <u>Apr</u> | <u>May</u> | <u>Jun</u> | <u>Jul</u> | <u>Aug</u> | <u>Sep</u> | <u>Oct</u> | <u>Nov</u> | <u>Dec</u> |
|----------------------------------------------|-----------------------|------------------------|------------|------------|------------|------------|------------|------------|------------|------------|------------|------------|------------|------------|
| <b>Hymenoptera: Apidae</b>                   |                       |                        |            |            |            |            |            |            |            |            |            |            |            |            |
| - <i>Apis mellifera</i> <sup>3</sup>         | 0                     | 1                      |            | B          |            |            |            |            |            |            |            |            |            |            |
| <b>Hymenoptera: Formicidae</b>               |                       |                        |            |            |            |            |            |            |            |            |            |            |            |            |
| - <i>Solenopsis invicta</i> <sup>3</sup>     | 1                     | 2                      |            |            |            |            |            |            | AB         | C          |            |            |            |            |
| - <i>Nylanderia fulva</i> , <sup>3</sup>     | 0                     | 1                      |            |            |            | D          |            |            |            |            |            |            |            |            |
| <b>Hymenoptera: Chalcididae</b>              |                       |                        |            |            |            |            |            |            |            |            |            |            |            |            |
| - <i>Brachymeria fonscolombei</i>            | 1                     | 0                      |            |            |            |            |            |            | B          |            |            |            |            |            |
| <b>Hymenoptera: Pteromalidae</b>             |                       |                        |            |            |            |            |            |            |            |            |            |            |            |            |
| - <i>Nasonia vitripennis</i>                 | 0                     | 1                      |            | D          |            |            |            |            |            |            |            |            |            |            |
| <b>Dictyoptera: Blatellidae</b>              |                       |                        |            |            |            |            |            |            |            |            |            |            |            |            |
| - <i>Blatella germanica</i> <sup>3</sup>     |                       |                        |            |            |            |            |            |            |            |            |            |            | B          |            |
| <b>Lepidoptera</b>                           | 1                     | 2                      |            |            |            |            |            |            | C          |            | C          |            | B          |            |
| <b>Orthoptera: Gryllidae</b> <sup>3</sup>    | 0                     | 1                      |            |            |            |            |            |            |            | C          |            |            |            |            |
| <b>Orthoptera: Cicadellidae</b> <sup>3</sup> | 0                     | 1                      |            |            |            |            |            |            |            |            |            |            |            | B          |
| <b>Nematoda</b>                              | 1                     | 1                      |            | C          |            | D          |            |            | B          |            |            |            |            |            |
| <b>Acari: Astigmatidae</b>                   | 0                     | 3                      |            | C          |            |            |            |            |            |            |            |            |            | C          |
| - <i>Myianoetus muscuarum</i> <sup>4</sup>   | 0                     | 2                      |            | C          |            |            |            |            |            |            |            |            |            |            |
| <b>Acari: Macrochelidae</b>                  | 0                     | 1                      |            |            |            |            |            |            |            |            |            |            |            | A          |
| <b>Heteroptera: Cimicidae</b>                |                       |                        |            |            |            |            |            |            |            |            |            |            |            |            |
| - <i>Cimex lectularis</i> <sup>3</sup>       | 1                     | 0                      |            |            |            |            |            |            |            | C          |            |            |            |            |
| <b>Annelida</b> <sup>3</sup>                 | 0                     | 1                      |            |            |            |            |            |            |            |            |            |            |            | C          |
| <b>Diplopoda</b> <sup>3</sup>                | 0                     | 1                      |            | C          |            |            |            |            |            |            |            |            |            |            |
| <b>Isopoda</b> <sup>3</sup>                  | 0                     | 3                      |            |            |            | C          |            |            | C          |            |            |            |            | B          |

**Table 1. A list of insect and arthropod species collected during selected medicolegal death investigations handled by the Harris County Institute of Forensic Sciences from January 2013 through April 2016. The month of recorded collection is indicated by the letters A for 2013, B for 2014, C for 2015 and D for 2016. <sup>1</sup>Confirmation of this species is based on the appearance of male genitalia from reared adult males and this could be an underestimate of actual abundance for this species because reared males may not always be obtained. <sup>2</sup>Identification of this specimen is based on a single larva and is tentatively identified to the species level. <sup>3</sup>These species may be regularly observed at scenes but not regularly collected and reported upon because they are not typically related to time of colonization estimation. <sup>4</sup>This species was recently associated with *Synthesiomyia nudiseta* [39].**

| <b>Species/group</b>                          | <b><u>N</u><br/><u>In</u></b> | <b><u>N</u><br/><u>Out</u></b> | <b><u>Avg. Ambient</u><br/><u>Temperature</u><br/><u>(+/-st.dev.)</u></b> | <b><u>Avg.</u><br/><u>Ambient</u><br/><u>Relative</u><br/><u>Humidity</u><br/><u>(+/-st.dev.)</u></b> | <b><u>Avg. TOC</u><br/><u>(days)</u><br/><u>(+/-st.dev.)</u></b> |
|-----------------------------------------------|-------------------------------|--------------------------------|---------------------------------------------------------------------------|-------------------------------------------------------------------------------------------------------|------------------------------------------------------------------|
| <b>Diptera: Sarcophagidae</b>                 | <b>85</b>                     | <b>8</b>                       | 25.8°C (5.1)                                                              | 50.8% (14.8)                                                                                          | 9.7d (12.1)                                                      |
| - <i>Blaesoxipha plinthopyga</i> <sup>1</sup> | <b>37</b>                     | <b>0<sup>1</sup></b>           | 25.7°C (4.4)                                                              | 49.6% (13.7)                                                                                          | 9.8d (9.5)                                                       |
| <b>Diptera: Phoridae</b>                      | <b>60</b>                     | <b>2</b>                       | 24.1°C (4.5)                                                              | 53.0% (16.5)                                                                                          | 8.8d (7.6)                                                       |
| - <i>Megaselia scalaris</i>                   | <b>59</b>                     | <b>2</b>                       | 24.1°C (4.5)                                                              | 53.0% (16.5)                                                                                          | 8.8d (7.6)                                                       |
| - <i>Dorniphora cornuta</i> <sup>2</sup>      | <b>1</b>                      | <b>0</b>                       | 16.6°C (unk)                                                              | 56% (unk)                                                                                             | 12d (unk)                                                        |
| <b>Diptera: Calliphoridae</b>                 | <b>64</b>                     | <b>56</b>                      | 26.9°C (7.2)                                                              | 53.5% (19.1)                                                                                          | 11.3d (18.2)                                                     |
| - <i>Phormia regina</i>                       | <b>12</b>                     | <b>8</b>                       | 22.4°C (7.2)                                                              | 47.4% (18.0)                                                                                          | 8.3d (10.8)                                                      |
| - <i>Cochliomyia macellaria</i>               | <b>17</b>                     | <b>20</b>                      | 29.2°C (6.7)                                                              | 54.3% (16.5)                                                                                          | 4.9d (6.5)                                                       |
| - <i>Chrysomya rufifacies</i>                 | <b>34</b>                     | <b>36</b>                      | 27.7°C (7.8)                                                              | 52.4% (21.7)                                                                                          | 14.5d (21.2)                                                     |
| - <i>Chrysomya megacephala</i>                | <b>21</b>                     | <b>19</b>                      | 28.0°C (6.6)                                                              | 55.6% (19.6)                                                                                          | 3.6d (3.4)                                                       |
| - <i>Lucilia eximia</i>                       | <b>3</b>                      | <b>17</b>                      | 29.2°C (6.6)                                                              | 56.3% (21.8)                                                                                          | 2.2d (2.8)                                                       |
| - <i>Lucilia cuprina</i>                      | <b>8</b>                      | <b>1</b>                       | 27.4°C (7.5)                                                              | 45.1% (10.9)                                                                                          | 4.7d (1.9)                                                       |
| - <i>Lucilia sericata</i>                     | <b>1</b>                      | <b>0</b>                       | unk                                                                       | unk                                                                                                   | 2.0 (unk)                                                        |
| - <i>Calliphora vomitoria</i>                 | <b>0</b>                      | <b>2</b>                       | 21.2°C (10.3)                                                             | 44.5% (4.9)                                                                                           | 9.5d (3.5)                                                       |
| - <i>Calliphora livida</i>                    | <b>0</b>                      | <b>1</b>                       | 15.2°C (8.8)                                                              | 47% (12.7)                                                                                            | 0 (unk)                                                          |
| - <i>Calliphora coloradensis</i>              | <b>0</b>                      | <b>1</b>                       | 6.1°C (unk)                                                               | 75% (unk)                                                                                             | 30d (unk)                                                        |
| - <i>Calliphora vicina</i>                    | <b>1</b>                      | <b>0</b>                       | 25°C (unk)                                                                | 36% (unk)                                                                                             | 8d (unk)                                                         |
| <b>Diptera: Muscidae</b>                      | <b>20</b>                     | <b>14</b>                      | 24.9°C (8.7)                                                              | 52.2% (22.8)                                                                                          | 19.6d (21.4)                                                     |
| - <i>Synthesiomyia nudiseta</i>               | <b>9</b>                      | <b>1</b>                       | 22.7°C (6.8)                                                              | 50.6% (21.4)                                                                                          | 17.4d (22.9)                                                     |
| - <i>Musca domestica</i>                      | <b>4</b>                      | <b>1</b>                       | 26.4°C (8.2)                                                              | 33.8% (20.3)                                                                                          | 8.8d (8.2)                                                       |
| - <i>Hydrotea sp.</i>                         | <b>7</b>                      | <b>10</b>                      | 26.7°C (11.2)                                                             | 57.7% (25.4)                                                                                          | 21.1d (22.8)                                                     |
| - <i>Fannia scalaris</i>                      | <b>0</b>                      | <b>1</b>                       | 30.6°C (unk)                                                              | 64% (unk)                                                                                             | 11d (unk)                                                        |
| <b>Diptera: Piophilidae</b>                   |                               |                                |                                                                           |                                                                                                       |                                                                  |
| - <i>Piophila casei</i>                       | <b>2</b>                      | <b>4</b>                       | 26.2°C (9.3)                                                              | 53.0% (21.1)                                                                                          | 21.1d (37.6)                                                     |
| <b>Diptera: Stratiomyidae</b>                 |                               |                                |                                                                           |                                                                                                       |                                                                  |
| - <i>Hermetia illucens</i>                    | <b>2</b>                      | <b>6</b>                       | 23.3°C (10.0)                                                             | 57.6% (20.6)                                                                                          | 53.0d (33.3)                                                     |
| <b>Coleoptera: Dermestidae</b>                | <b>8</b>                      | <b>11</b>                      | 25.5°C (5.5)                                                              | 57.5% (16.4)                                                                                          | 29.9d (25.6)                                                     |
| <b>Coleoptera: Nitidulidae</b>                |                               |                                |                                                                           |                                                                                                       |                                                                  |
| - <i>Omosita sp.</i>                          | <b>0</b>                      | <b>5</b>                       | 25.6°C (4.7)                                                              | 67.0% (30.4)                                                                                          | 36.8d (21.5)                                                     |
| <b>Coleoptera: Histeridae</b> <sup>3</sup>    | <b>1</b>                      | <b>3</b>                       | 32.0°C (6.5)                                                              | 54.4% (25.6)                                                                                          | 5.2d (4.3)                                                       |
| <b>Coleoptera: Silphidae</b> <sup>3</sup>     | <b>0</b>                      | <b>2</b>                       | 16.8°C (4.1)                                                              | 63.0% (21.2)                                                                                          | 5.0d (2.8)                                                       |
| <b>Coleoptera: Cleridae</b> <sup>3</sup>      | <b>3</b>                      | <b>0</b>                       | 27.5°C (unk)                                                              | 83% (unk)                                                                                             | 10d (unk)                                                        |

| <b>Species/group</b>                       | <b><u>N</u><br/><u>In</u></b> | <b><u>N</u><br/><u>Out</u></b> | <b><u>Avg.</u><br/><u>Temperature</u><br/><u>(+/-st.dev.)</u></b> | <b><u>Avg.</u><br/><u>Relative</u><br/><u>Humidity</u><br/><u>(+/-st.dev.)</u></b> | <b><u>Avg.</u><br/><u>TOC</u><br/><u>(days)</u><br/><u>(+/-</u><br/><u>st.dev.)</u></b> |
|--------------------------------------------|-------------------------------|--------------------------------|-------------------------------------------------------------------|------------------------------------------------------------------------------------|-----------------------------------------------------------------------------------------|
| <b>Hymenoptera: Apidae</b>                 |                               |                                |                                                                   |                                                                                    |                                                                                         |
| - <i>Apis mellifera</i> <sup>3</sup>       | <b>0</b>                      | <b>1</b>                       | 29.8°C (unk)                                                      | 39% (unk)                                                                          | n/a                                                                                     |
| <b>Hymenoptera: Formicidae</b>             |                               |                                |                                                                   |                                                                                    |                                                                                         |
| - <i>Solenopsis invicta</i> <sup>3</sup>   | <b>1</b>                      | <b>2</b>                       | 34.7°C (2.3)                                                      | 42.7% (13.3)                                                                       | 2d (unk)                                                                                |
| <b>Hymenoptera: Chalcididae</b>            |                               |                                |                                                                   |                                                                                    |                                                                                         |
| - <i>Brachymeria fonscolombeii</i>         | <b>1</b>                      | <b>0</b>                       | 31.1°C (unk)                                                      | 60% (unk)                                                                          | 16d (unk)                                                                               |
| <b>Hymenoptera: Pteromalidae</b>           |                               |                                |                                                                   |                                                                                    |                                                                                         |
| - <i>Nasonia vitripennis</i>               | <b>0</b>                      | <b>1</b>                       | 34.9°C (unk)                                                      | 32% (unk)                                                                          | 43d (unk)                                                                               |
| <b>Acari: Astigmatidae</b>                 | <b>0</b>                      | <b>3</b>                       |                                                                   |                                                                                    |                                                                                         |
| - <i>Myianoetus muscuorum</i> <sup>5</sup> | <b>0</b>                      | <b>2</b>                       | 19.2°C (2.0)                                                      | 51.3% (30.5)                                                                       | 22.3d<br>(2.1)                                                                          |
| <b>Heteroptera: Cimicidae</b>              |                               |                                |                                                                   |                                                                                    |                                                                                         |
| - <i>Cimex lectularis</i> <sup>3</sup>     | <b>1</b>                      | <b>0</b>                       | 33.5°C (unk)                                                      | 54% (unk)                                                                          | 18d (unk)                                                                               |
| <b>Isopoda</b> <sup>3</sup>                | <b>0</b>                      | <b>3</b>                       | 28.5°C (17.6)                                                     | 47.5% (37.5)                                                                       | 40.3d<br>(51.1)                                                                         |

575 **Table 2. Number of cases coming from indoor and outdoor scene investigations with the**  
576 **average observed ambient scene temperature (°C) relative humidity (%) and the average**  
577 **maximum estimated time of colonization (TOC) for selected species collected in Harris**  
578 **County from January 2013 through April 2016 (N=203). <sup>1</sup>Confirmation of this species is**  
579 **based on the appearance of male genitalia from reared adult males and this could be an**  
580 **underestimate of actual abundance for this species because reared males may not always be**  
581 **obtained. <sup>2</sup>Identification of this specimen is based on a single larva and is tentatively**  
582 **identified to the species level. <sup>3</sup>These species may be regularly observed at scenes but not**  
583 **regularly collected and reported upon because they are not typically related to time of**  
584 **colonization estimation. <sup>4</sup>This species was recently associated with *Synthesiomyia nudiseta***  
585 **[39].**



| <b>Comparison</b>                                        | <b>Kruskal-Wallis<br/>X<sup>2</sup> Test Statistic</b> | <b>d.f.</b> | <b>P-value</b>     |
|----------------------------------------------------------|--------------------------------------------------------|-------------|--------------------|
| Ambient scene temperature by scene location <sup>1</sup> | 8.1531                                                 | 1           | <b>0.00430*</b>    |
| Relative humidity by scene location <sup>1</sup>         | 1.0947                                                 | 1           | 0.2954             |
| Length of TOC estimate by scene location                 | 7.9093                                                 | 2           | <b>0.01917*</b>    |
| Ambient scene temperature by stage of decomposition      | 2.0434                                                 | 4           | 0.7278             |
| Scene relative humidity by stage of decomposition        | 2.1554                                                 | 4           | 0.7072             |
| Length of TOC estimate by stage of decomposition         | 77.682                                                 | 4           | <b>&gt;0.0001*</b> |

586 **Table 3. Kruskal-Wallis Chi-Squared statistical comparisons for ambient scene**  
587 **temperature, relative humidity and length of the TOC estimate (days) by scene location**  
588 **and stage of decomposition.** <sup>1</sup>**Temperature and relative humidity comparisons did not**  
589 **include hospital cases, as these measurements were not made at the hospital. \*indicates a**  
590 **significant difference at the  $\alpha=0.05$  level.**

591

| Groups with $\geq 5$ cases     | N   | Probability of success | 95% confidence interval of success |        | P-value              |
|--------------------------------|-----|------------------------|------------------------------------|--------|----------------------|
|                                |     |                        | min                                | max    |                      |
| <i>Blaesoxipha plinthopyga</i> | 39  | 0.9744                 | 0.8652                             | 0.9994 | <b>1.46E-10*</b>     |
| <i>Megaselia scalaris</i>      | 67  | 0.9701                 | 0.8963                             | 0.9964 | <b>&lt;2.20E-16*</b> |
| <i>Lucilia cuprina</i>         | 11  | 0.9091                 | 0.5872                             | 0.9977 | <b>0.01172*</b>      |
| Sarcophagidae                  | 103 | 0.9029                 | 0.8287                             | 0.9525 | <b>&lt;2.20E-16*</b> |
| <i>Synthesiomyia nudiseta</i>  | 18  | 0.8889                 | 0.6529                             | 0.9862 | <b>0.001312*</b>     |
| <i>Musca domestica</i>         | 5   | 0.8000                 | 0.2836                             | 0.9949 | 0.375                |
| <i>Phormia regina</i>          | 31  | 0.5806                 | 0.3908                             | 0.7545 | 0.4731               |
| Calliphoridae                  | 134 | 0.5448                 | 0.4565                             | 0.6310 | 0.342                |
| <i>Chrysomya rufifacies</i>    | 78  | 0.5000                 | 0.3846                             | 0.6154 | 1                    |
| <i>Cochliomyia macellaria</i>  | 46  | 0.4783                 | 0.3289                             | 0.6305 | 0.883                |
| <i>Hydrotea</i> sp.            | 21  | 0.4762                 | 0.2571                             | 0.7022 | 1                    |
| <i>Dermestes maculatus</i>     | 22  | 0.4091                 | 0.2071                             | 0.6365 | 0.5235               |
| <i>Piophilha casei</i>         | 7   | 0.2857                 | 0.0367                             | 0.7096 | 0.4531               |
| <i>Hermetia illucens</i>       | 8   | 0.2500                 | 0.0319                             | 0.6509 | 0.2891               |
| <i>Lucilia eximia</i>          | 22  | 0.0000                 | 0.0000                             | 0.1544 | <b>4.77E-07*</b>     |
| Nitidulidae                    | 5   | 0.0000                 | 0.0000                             | 0.5218 | 0.0625               |

592 **Table 4. Exact binomial test results indicating the probability of success as defined by**  
593 **encountering a particular insect group indoors. The 95% confidence interval and P-value**  
594 **for each test are also provided. \*indicates a significant difference at the  $\alpha=0.05$  level.**  
595 **Statistics were only calculated for cases where each insect group was encountered five or**  
596 **more times during the study period.**

597

598 **Figure Captions:**

599 **Figure 1: Forensic Entomology Cases by Official Manner of Death and Scene Location.**

600 Percentage of forensic entomology cases over the study period (January 2013 - April 2016) by  
601 official manner of death classification, showing the proportion of cases where the scene was  
602 located indoors (blue) or outdoors (red). (N=203).

603 **Figure 2: Average ambient scene temperature by scene location.**

604 Average (+/-standard deviation) ambient air temperature (°C) recorded near the decedent at  
605 scenes located indoors and outdoors for forensic entomology cases over the study period  
606 (January 2013 – April 2016). (N=203).

607 **Figure 3: Average TOC length (days) by scene location.**

608 Average (+/-standard deviation) time of colonization (TOC) estimate (days) by scene location for  
609 forensic entomology cases over the study period (January 2013 – April 2016). (N=203).

610

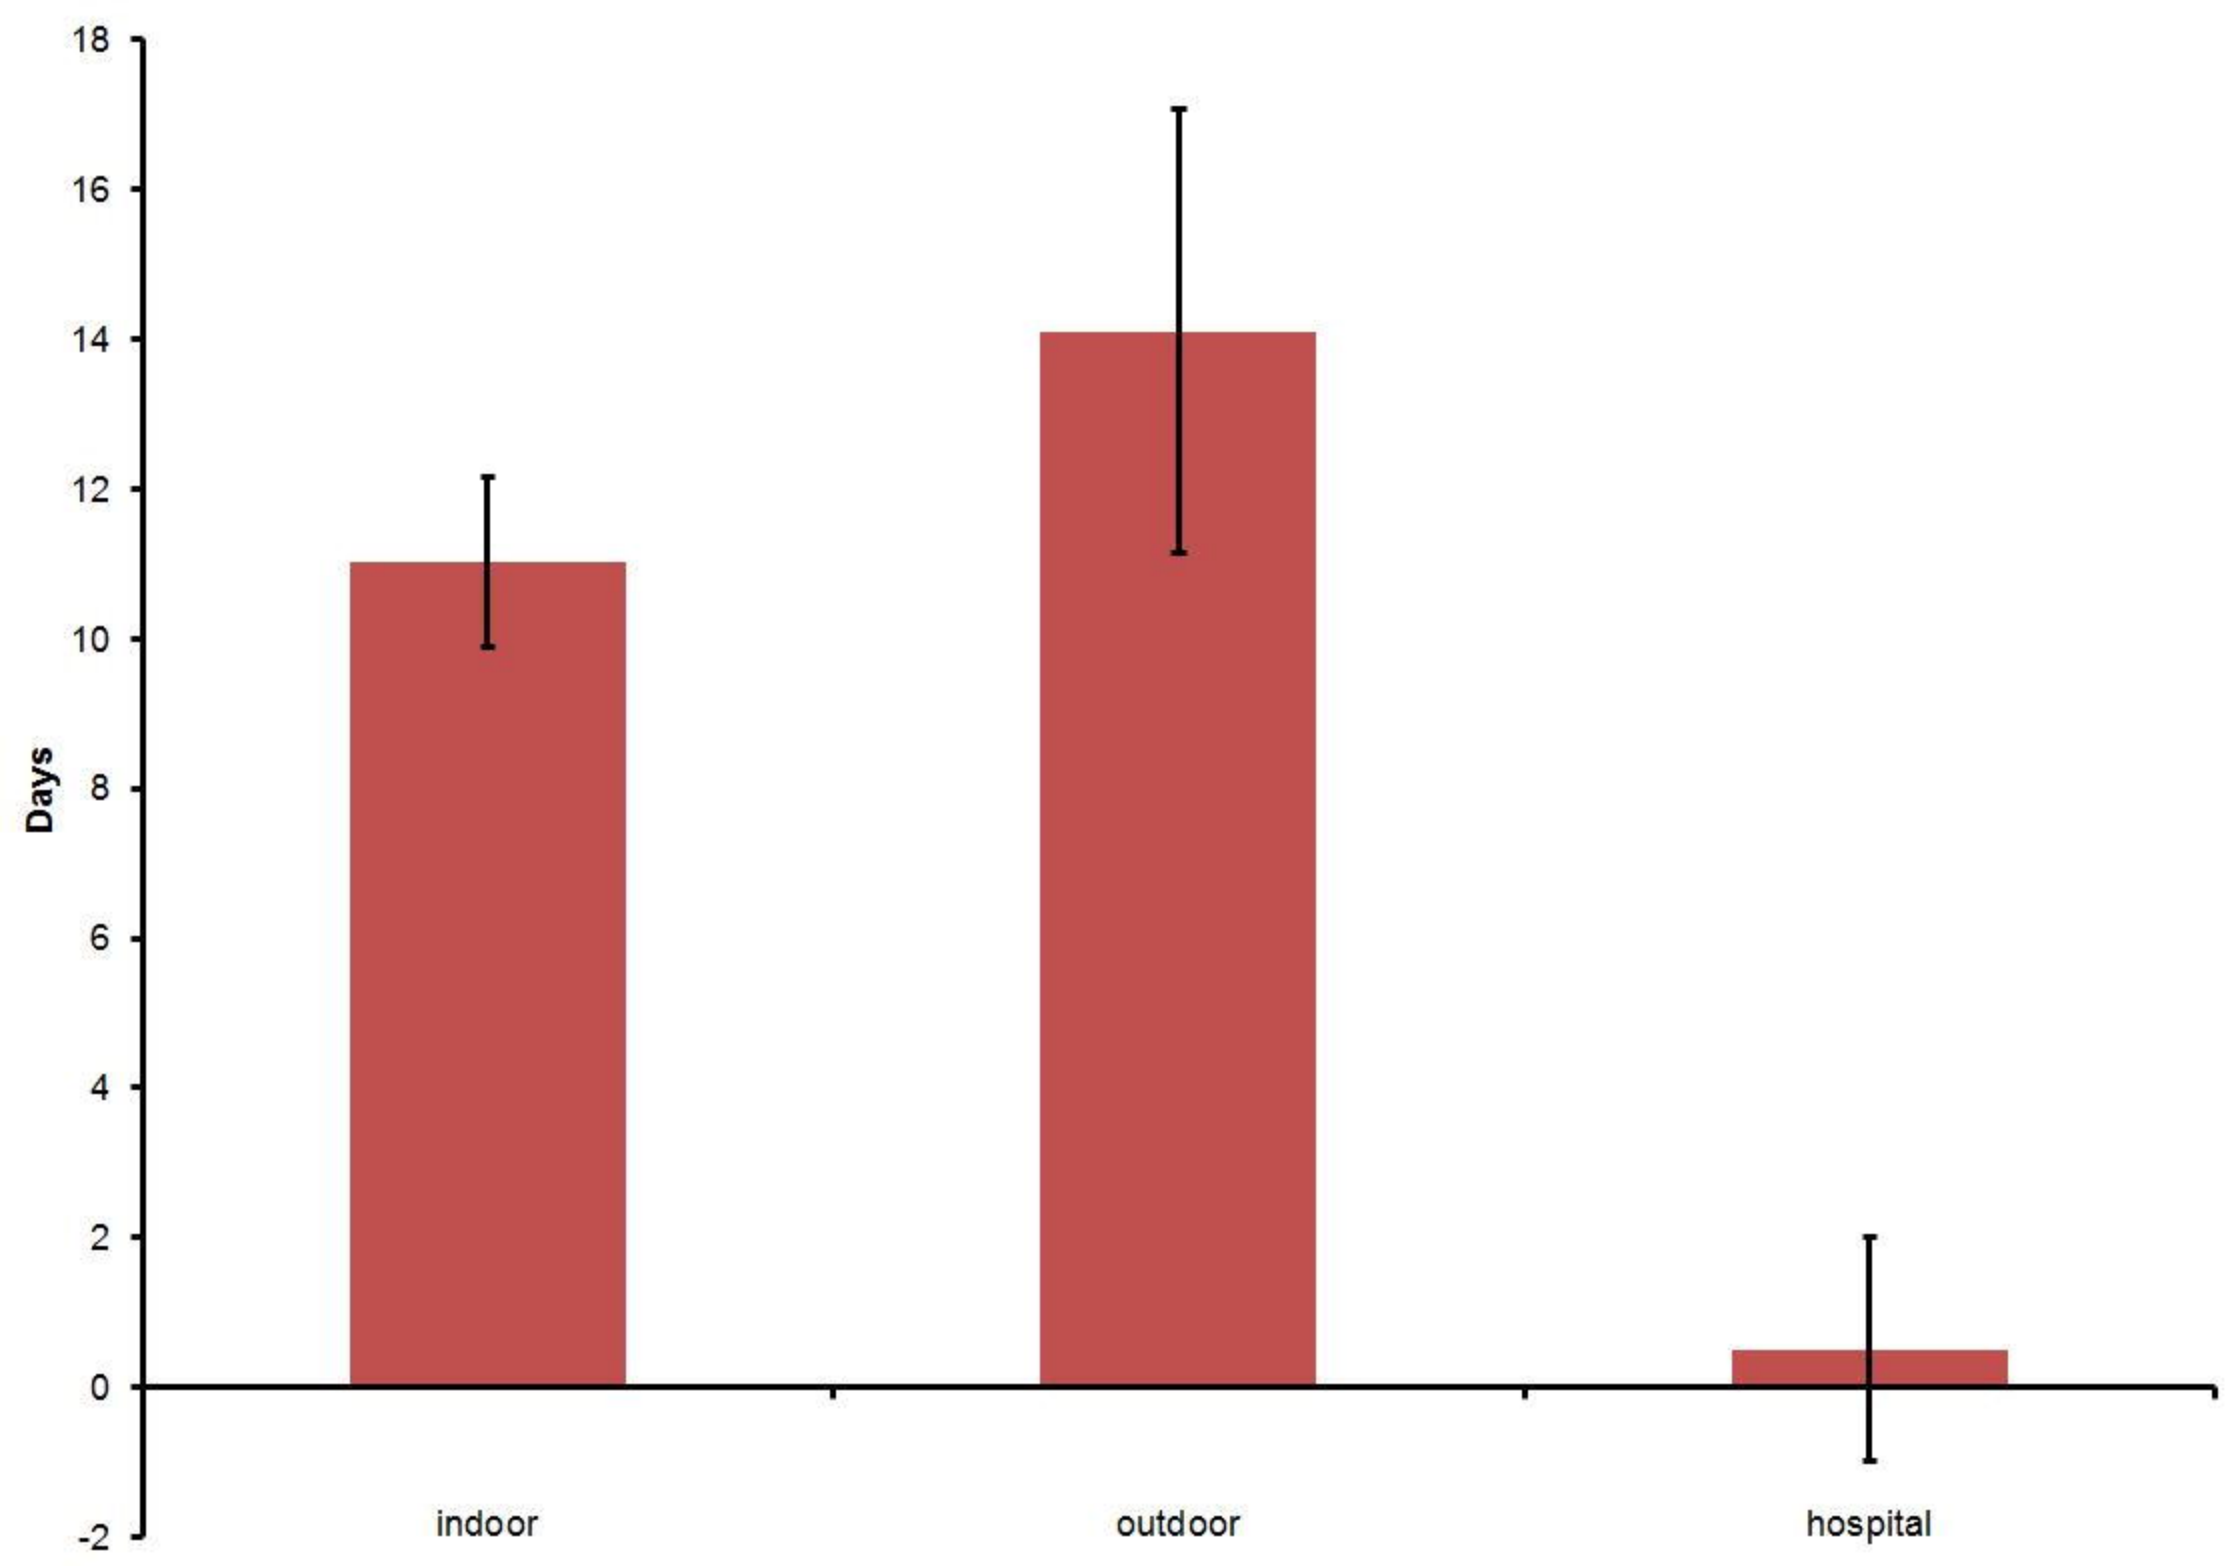

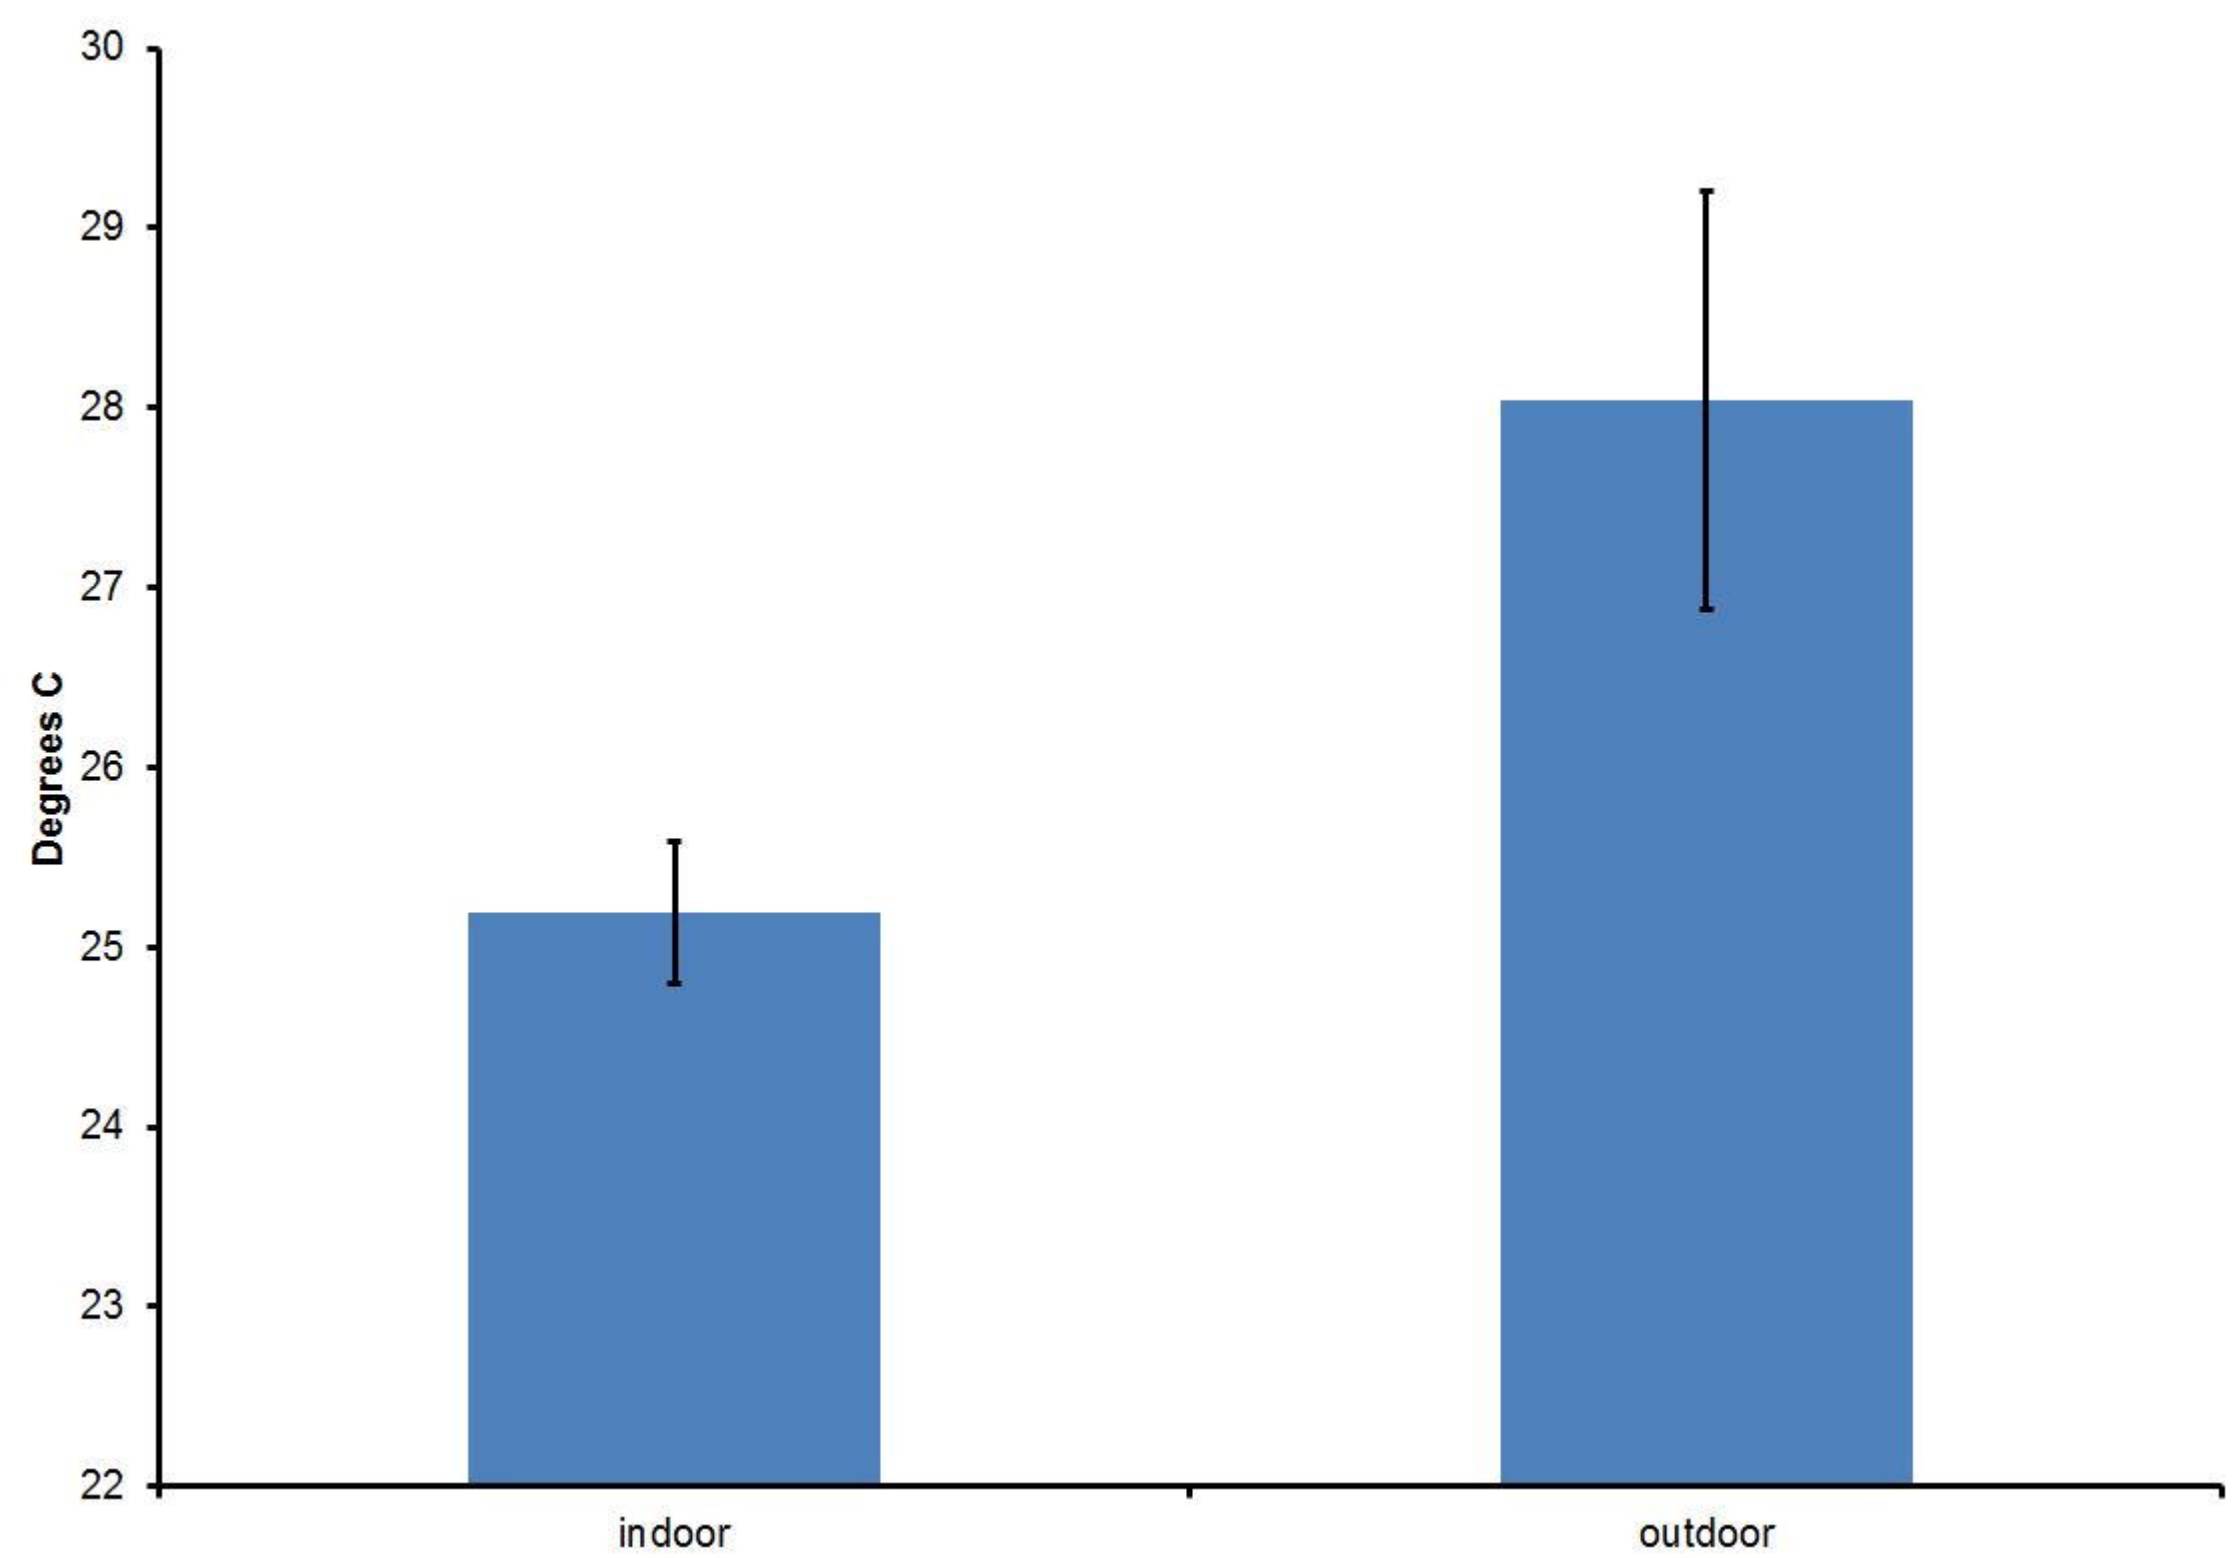

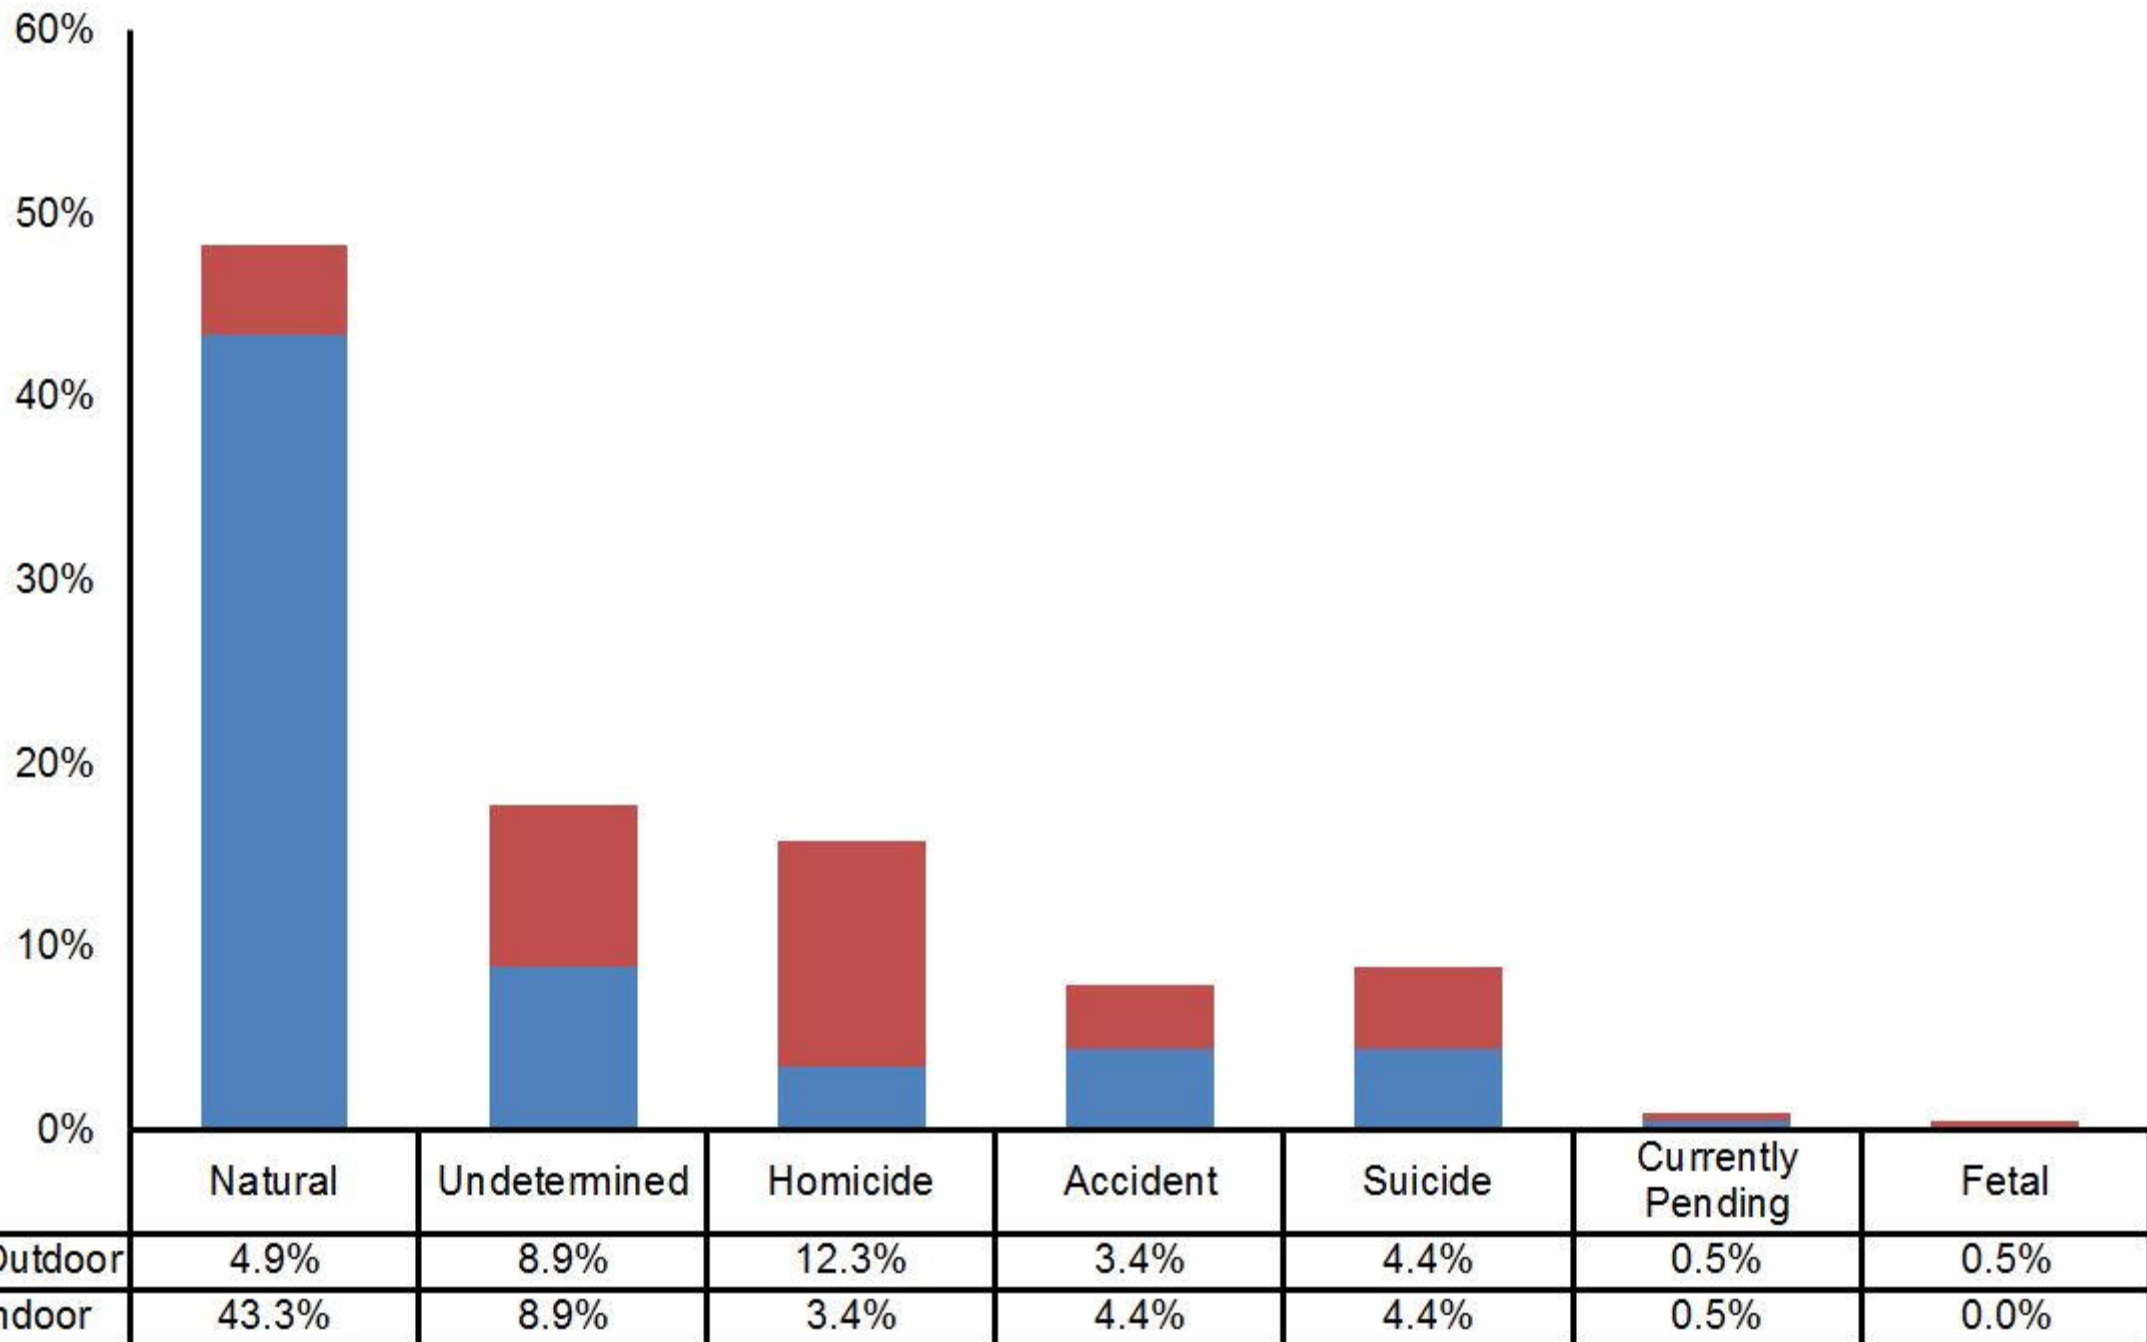

Source: https://www.biorxiv.org/content/10.1101/071027v2.full.pdf
